# Supplementary material for: Synthesis and structural studies of copper(ii) complex with N2S2 based N-substituted pendant phosphonic acid arms
Source: Royal Society of Chemistry journal article supplement (doi:10.1039/c9dt04869c), 2020-01-01
Supplement: c9dt04869c1.pdf [file c9dt04869c1.pdf]

## Electronic Supplementary Information

### Synthesis and Structural Studies of Copper(II) Complex With N<sub>2</sub>S<sub>2</sub> Based *N*-Substituted Pendant Phosphonic Acid Arms

Ian S. Taschner<sup>†\*</sup>, Ethan Aubuchon<sup>†</sup>, Briana Schrage<sup>II</sup>, and Christopher Ziegler<sup>II</sup>, Art van der Est<sup>III</sup>

<sup>†</sup> Department of Chemistry, Indiana University Northwest, Gary, Indiana 46408

<sup>II</sup> Department of Chemistry, The University of Akron, Akron, Ohio 44325

<sup>III</sup> Department of Chemistry, Brock University, St. Catharines, ON L2S 3A1

\* Email: [itaschne@iun.edu](mailto:itaschne@iun.edu)

Phone: 1-219-806-6744

#### Table of Contents

|                                                      |         |
|------------------------------------------------------|---------|
| Procedures.....                                      | S2-S4   |
| NMR Spectra.....                                     | S5-S25  |
| Mass Spectra.....                                    | S26-S28 |
| Crystallographic Data.....                           | S29-S31 |
| pH vs <sup>1</sup> H and <sup>31</sup> P nuclei..... | S32-S33 |
| UV-Vis K <sub>CuL</sub> data.....                    | S34-S35 |

## Procedures:

**((1,8-dithia-4,11-diazacyclotetradecane-4,11-diyl)bis(methylene))bis(phosphonic acid) (N<sub>2</sub>S<sub>2</sub>-POH).** A nitrogen flushed pressure vessel equipped with a magnetic stir bar was charged with 1,8-dithia-4,11-diazacyclotetradecane (0.100 g, 0.427 mmol), phosphonic acid (0.110 g, 1.28 mmol), 37% formaldehyde (0.10 mL, 1.28 mmol), water (1 mL) and 12 M HCl (0.11 mL, 1.28 mmol). The pressure flask was then submersed into an oil bath at 120 °C for 1 h and the solution was cooled to room temperature. An additional 37% formaldehyde (0.10 mL, 1.28 mmol) was added and the pressure vessel was again submersed in an oil bath at 120 °C for an additional 1 h. The reaction was cooled to room temperature, solvent removed *in vacuo*, and the residue loaded onto Dowex ion exchange resin 50W-X12 (H<sup>+</sup> form) and flushed with water, 0.5 M HCl, 1 M HCl, and the desired compound was eluted off with 2 M HCl. The 2 M HCl fractions were concentrated *in vacuo* to afford ((1,8-dithia-4,11-diazacyclotetradecane-4,11-diyl)bis(methylene))bis(phosphonic acid) as a white residue in 38% yield (0.804 g, 0.162 mmol). <sup>1</sup>H NMR (400 MHz, Deuterium Oxide, 25 °C) δ 3.48 (bs, 4H), 3.37 (bt, *J* = 7.9 Hz, 4H), 3.27 (d, *J* = 12.7 Hz, 4H), 2.86 (t, *J* = 7.8 Hz, 4H), 2.60 (bs, 4H), 1.94 (bp, *J* = 7.9 Hz, 4H). <sup>13</sup>C NMR (101 MHz, Deuterium Oxide, 25 °C) δ 52.18, 52.14, 52.01, 51.97, 50.64, 26.82, 22.83, 22.43. <sup>1</sup>H NMR (400 MHz, Deuterium Oxide, 65 °C) δ 3.95 (t, *J* = 7.5 Hz, 1H), 3.86 (t, *J* = 7.9 Hz, 1H), 3.71 (d, *J* = 12.6 Hz, 1H), 3.36 (t, *J* = 7.4 Hz, 1H), 3.11 (t, *J* = 7.1 Hz, 1H), 2.44 (p, *J* = 6.8, 6.3 Hz, 1H). <sup>13</sup>C NMR (101 MHz, Deuterium Oxide, 65 °C) δ 53.49, 53.37, 51.64, 28.13, 24.57, 23.37. IR  $\nu_{\max}$  3363, 2496, 2367, 2296, 1646, 1456, 1211 cm<sup>-1</sup>. HRMS (ESI) *m/z* [M-H] calcd for C<sub>12</sub>H<sub>27</sub>O<sub>6</sub>N<sub>2</sub>P<sub>2</sub>S<sub>2</sub> 421.0791, found 421.0785.

**tetraethyl((1,8-dithia-4,11-diazacyclotetradecane-4,11-diyl)bis(methylene))bis(phosphonate) (N<sub>2</sub>S<sub>2</sub>-POEt).** A 10 mL flame dried round bottom flask equipped with a magnetic stir bar, rubber septum and nitrogen inlet was charged with 1,8-dithia-4,11-diazacyclotetradecane (0.100 g, 0.427 mmol), THF (degassed, 1.4 mL), paraformaldehyde (2.5 equiv., 0.033 g) and triethyl phosphite (0.18 mL, 1.02 mmol). The solution was stirred at 23 °C for 4 days then concentrated *in vacuo*. The crude residue was basified to pH ~ 12 with 6 M NaOH and extracted with CHCl<sub>3</sub> (5 x 10 mL). The combined organic layers were dried with sodium sulfate, filtered, concentrated *in vacuo* and subjected to column chromatography (EtOAc → EtOAc:10 % MeOH) to afford tetraethyl((1,8-dithia-4,11-diazacyclotetradecane-4,11-diyl)bis(methylene))bis(phosphonate) in a 72% yield (165 mg, 0.307 mmol) as a clear oil. *R<sub>f</sub>* = 0.1, EtOAc. <sup>1</sup>H NMR (400 MHz, Chloroform-d) δ 4.15 – 3.97 (m, 8H), 2.83 (d, *J* = 9.8 Hz, 4H), 2.73 (td, *J* = 6.6, 4.3 Hz, 8H), 2.67 – 2.45 (m, 8H), 1.72 (p, *J* = 6.7 Hz, 4H), 1.26 (t, *J* = 7.1 Hz, 12H). <sup>13</sup>C NMR (101 MHz, Chloroform-d) δ 61.85, 61.78, 53.92, 53.83, 53.64, 53.59, 51.34, 49.76, 28.99, 28.80, 27.32, 16.54, 16.48. IR  $\nu_{\max}$  3446, 3274, 2979, 2926, 2911, 2810, 1651, 1443, 1391, 1224, 1020, 959 cm<sup>-1</sup>. HRMS (ESI) *m/z* [M+H] calcd for C<sub>20</sub>H<sub>45</sub>O<sub>6</sub>N<sub>2</sub>P<sub>2</sub>S<sub>2</sub> 535.2189, found 535.2189. HRMS (ESI) *m/z* [M+Na] calcd for C<sub>20</sub>H<sub>44</sub>O<sub>6</sub>N<sub>2</sub>NaP<sub>2</sub>S<sub>2</sub> 557.2008, found 557.2008.

**Triethyl ammonium ((11-((hydroxyoxidophosphoryl)methyl)-1,8-dithia-4,11-diammoniocyclotetradeca-4,11-dium-4-yl)methyl)phosphonate (N<sub>2</sub>S<sub>2</sub>-PON).** A nitrogen flushed pressure vessel equipped with a magnetic stir bar was charged with 1,8-dithia-4,11-diazacyclotetradecane (0.100 g, 0.427 mmol), phosphonic acid (0.110 g, 1.28 mmol), 37% formaldehyde (0.10 mL, 1.28 mmol), water (1 mL) and 12 M HCl (0.11 mL, 1.28 mmol). The pressure flask was then submersed into an oil bath at 120 °C for 1 h and the solution was cooled to room temperature. An additional 37% formaldehyde (0.10 mL, 1.28 mmol) was added and the pressure vessel was again submersed in an oil bath at 120 °C for an additional 1 h. The reaction was cooled to room temperature, solvent removed in vacuo, and the residue loaded onto Dowex ion exchange resin 50W-X12 (H<sup>+</sup> form) and flushed with two column lengths of water, 0.5 M HCl, and three column lengths 2 M HCl. The 2 M HCl fractions were concentrated in vacuo to afford ((1,8-dithia-4,11-diazacyclotetradecane-4,11-diyl)bis(methylene))bis(phosphonic acid) as a white residue in 62% yield (0.131 g, 0.265 mmol). The product was dissolved in 2 M NEt<sub>3</sub> (2 mL) and precipitated out as the mono-ammonium salt with methanol (~2 mL). <sup>1</sup>H NMR (400 MHz, Deuterium Oxide) δ 3.48 (t, *J* = 7.8 Hz, 4H), 3.37 (t, *J* = 7.8 Hz, 4H), 3.06 (q, *J* = 7.4 Hz, 6H), 3.03 (s, 4H), 2.87 (t, *J* = 7.7 Hz, 4H), 2.62 (t, *J* = 7.3 Hz, 4H), 1.96 (p, *J* = 6.8, 6.4 Hz, 4H), 1.14 (t, *J* = 7.3 Hz, 9H). <sup>13</sup>C NMR (101 MHz, Deuterium Oxide) δ 52.92 (d, *J* = 126.5 Hz), 52.14 (d, *J* = 3.8 Hz), 51.98 (d, *J* = 3.8 Hz), 46.58, 26.96, 23.14, 22.62, 8.16. IR ν<sub>max</sub> 3342, 2501, 1644, 1455, 607, 580, 569 cm<sup>-1</sup>. HRMS (ESI) *m/z* [M]<sup>-</sup> calcd for C<sub>12</sub>H<sub>27</sub>O<sub>6</sub>N<sub>2</sub>P<sub>2</sub>S<sub>2</sub> 421.0791, found 421.0785.

**Dicesium((11-((hydroxyoxidophosphoryl)methyl)-1,8-dithia-4,11-diammoniocyclotetradeca-4,11-dium-4-yl)methyl)phosphonate (N<sub>2</sub>S<sub>2</sub>-POCs).** A nitrogen flushed pressure vessel equipped with a magnetic stir bar was charged with 1,8-dithia-4,11-diazacyclotetradecane (0.100 g, 0.427 mmol), phosphonic acid (0.110 g, 1.28 mmol), 37% formaldehyde (0.10 mL, 1.28 mmol), water (1 mL) and 12 M HCl (0.11 mL, 1.28 mmol). The pressure flask was then submersed into an oil bath at 120 °C for 1 h and the solution was cooled to room temperature. An additional 37% formaldehyde (0.10 mL, 1.28 mmol) was added and the pressure vessel was again submersed in an oil bath at 120 °C for an additional 1 h. The reaction was cooled to room temperature, solvent removed in vacuo, and the residue loaded onto Dowex ion exchange resin 50W-X12 (H<sup>+</sup> form) and flushed with two column lengths of water, 0.5 M HCl, and three column lengths 2 M HCl. The 2 M HCl fractions were concentrated in vacuo to afford ((1,8-dithia-4,11-diazacyclotetradecane-4,11-diyl)bis(methylene))bis(phosphonic acid) as a white residue in 62% yield (0.131 g, 0.265 mmol). The product was dissolved in 2 M Cs<sub>2</sub>CO<sub>3</sub> (2 mL) and precipitated out as the dicesium salt with methanol (~2 mL). <sup>1</sup>H NMR (400 MHz, Deuterium Oxide) δ 2.95 (t, *J* = 8.6 Hz, 4H), 2.84 (t, *J* = 7.9 Hz, 4H), 2.67 (t, *J* = 11.3 Hz, 4H), 2.62 (d, *J* = 11.7 Hz, 4H), 2.47 (t, *J* = 7.8 Hz, 4H), 1.81 – 1.66 (m, 4H). <sup>13</sup>C NMR (101 MHz, Deuterium Oxide) δ 53.63 (d, *J* = 132.6 Hz), 51.81 (d, *J* = 3.6 Hz), 51.75 (d, *J* = 3.5 Hz), 27.38, 24.12, 24.00. IR ν<sub>max</sub> 3201, 2941, 2588, 2281, 1620, 1311, 1368, 1233, 1171, 1121, 1100, 1025, 1002, 970, 916, cm<sup>-1</sup>. HRMS (ESI) *m/z* [M-H]<sup>-</sup> calcd for C<sub>12</sub>H<sub>27</sub>O<sub>6</sub>N<sub>2</sub>P<sub>2</sub>S<sub>2</sub> 421.0791, found 421.0784.

**Dipotassium((11-((hydroxyoxidophosphoryl)methyl)-1,8-dithia-4,11-diammoniocyclotetradeca-4,11-diium-4-yl)methyl)phosphonate (N<sub>2</sub>S<sub>2</sub>-POK).** A nitrogen flushed pressure vessel equipped with a magnetic stir bar was charged with 1,8-dithia-4,11-diazacyclotetradecane (0.100 g, 0.427 mmol), phosphonic acid (0.110 g, 1.28 mmol), 37% formaldehyde (0.10 mL, 1.28 mmol), water (1 mL) and 12 M HCl (0.11 mL, 1.28 mmol). The pressure flask was then submersed into an oil bath at 120 °C for 1 h and the solution was cooled to room temperature. An additional 37% formaldehyde (0.10 mL, 1.28 mmol) was added and the pressure vessel was again submersed in an oil bath at 120 °C for an additional 1 h. The reaction was cooled to room temperature, solvent removed in vacuo, and the residue loaded onto Dowex ion exchange resin 50W-X12 (H<sup>+</sup> form) and flushed with two column lengths of water, 0.5 M HCl, and three column lengths 2 M HCl. The 2 M HCl fractions were concentrated in vacuo to afford ((1,8-dithia-4,11-diazacyclotetradecane-4,11-diyl)bis(methylene))bis(phosphonic acid) as a white residue in 62% yield (0.131 g, 0.265 mmol). The product was dissolved in 2 M K<sub>2</sub>CO<sub>3</sub> (2 mL) and precipitated out as the dipotassium salt with ethanol (~2 mL). <sup>1</sup>H NMR (400 MHz, Deuterium Oxide) δ 3.45 (t, *J* = 7.6 Hz, 4H), 3.34 (t, *J* = 8.2, 7.5 Hz, 4H), 2.97 (d, *J* = 11.4 Hz, 4H), 2.87 (t, *J* = 7.8 Hz, 4H), 2.62 (t, *J* = 7.8 Hz, 4H), 1.95 (p, *J* = 7.8 Hz, 4H). <sup>13</sup>C NMR (101 MHz, Deuterium Oxide) δ 53.36 (d, *J* = 125.3 Hz), 52.12 (d, *J* = 4.2 Hz), 51.93 (d, *J* = 4.2 Hz), 27.07, 23.37, 22.92. IR ν<sub>max</sub> 3206, 2937, 2588, 2295, 1622, 1394, 1368, 1176, 1143, 1090, 1037, 1004, 970, 916, 829 cm<sup>-1</sup>. HRMS (ESI) *m/z* [M+K]<sup>+</sup> calcd for C<sub>12</sub>H<sub>28</sub>O<sub>6</sub>N<sub>2</sub>KP<sub>2</sub>S<sub>2</sub> 461.0496, found 461.0495.

**((1,8-dithia-4,11-diazacyclotetradecane-4,11-diyl)bis(methylene))bis-phosphonate copper(II) acetate (N<sub>2</sub>S<sub>2</sub>-POK-Cu).** A 10 mL round bottom flask equipped with a magnetic stir bar, rubber septa and nitrogen inlet was charged with 1,8-dithia-4,11-diazacyclotetradecane (20.00 mg, 0.036 mmol) and acetonitrile (1 mL) and allowed to stir at room temperature for 5 min. After, a solution of copper(II) acetate·H<sub>2</sub>O (7.19 mg, 0.036 mmol) in 18 MΩ water (1 mL) was added in one portion and the mixture was stirred at 23 °C for 5 min. Once copper(II) was added the solution turned bright green. The solution was then filtered through glass wool and concentrated in vacuo affording a green solid in quantitative yield (20.6 mg). IR ν<sub>max</sub> 3396, 2920, 2858, 1654, 1562, 1541, 1415, 1069, 966 cm<sup>-1</sup>. HRMS (ESI) *m/z* [M]<sup>+</sup> calcd for C<sub>12</sub>H<sub>25</sub>O<sub>6</sub>N<sub>2</sub>CuK<sub>2</sub>P<sub>2</sub>S<sub>2</sub> 559.9194, found 559.9192.

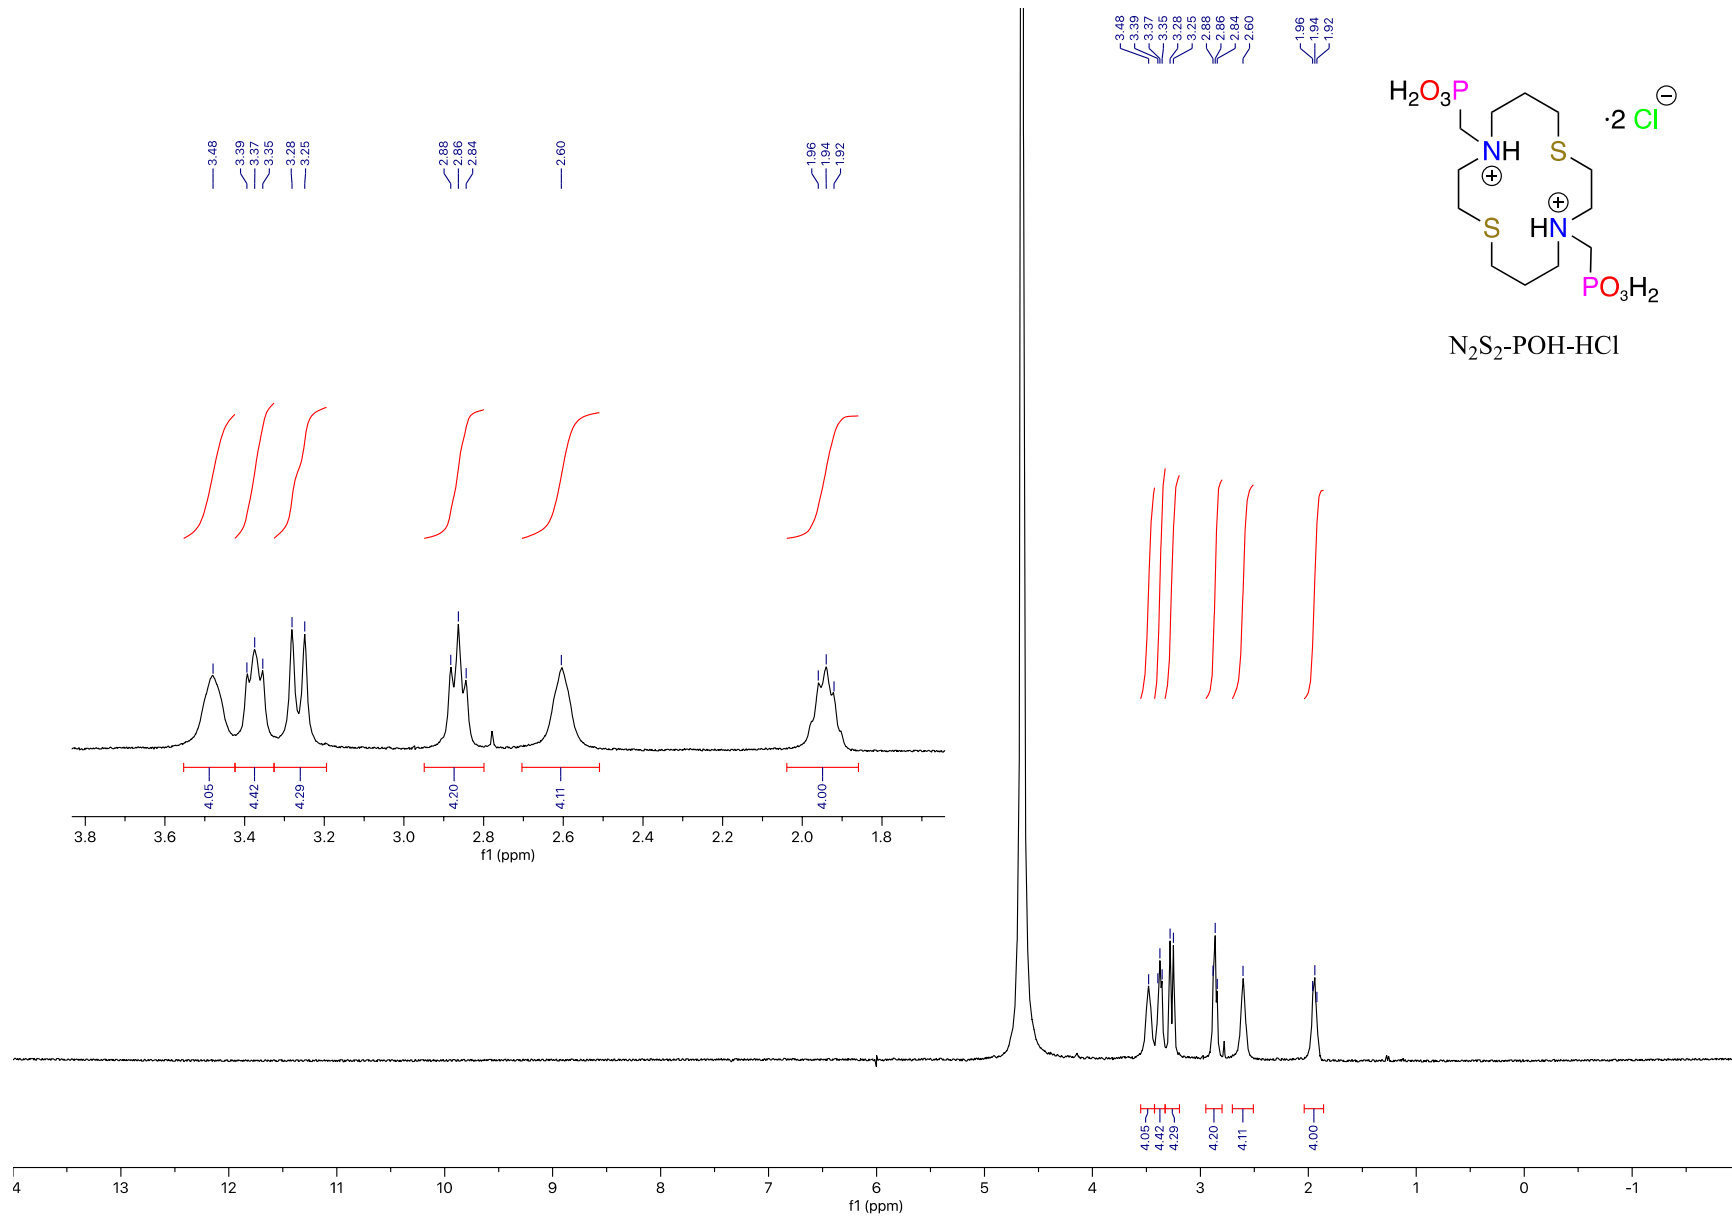

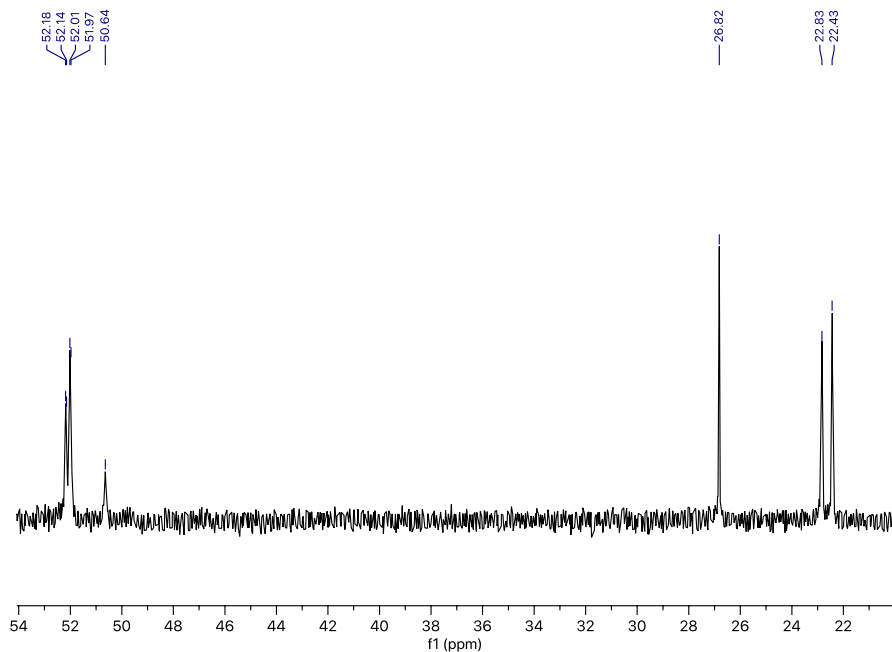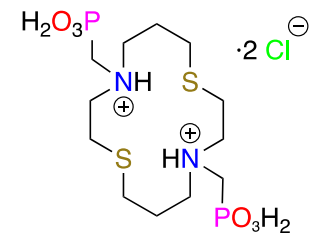

$\text{N}_2\text{S}_2\text{-POH-HCl}$

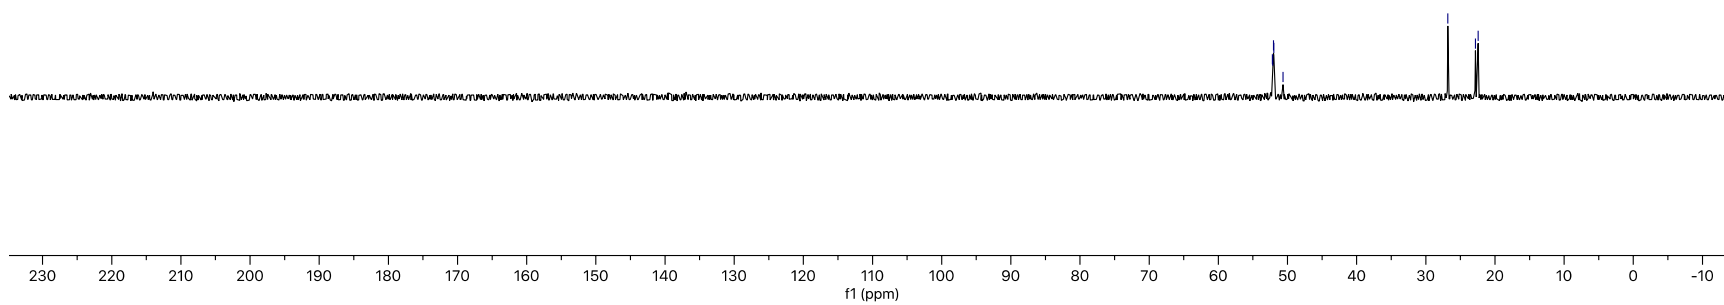

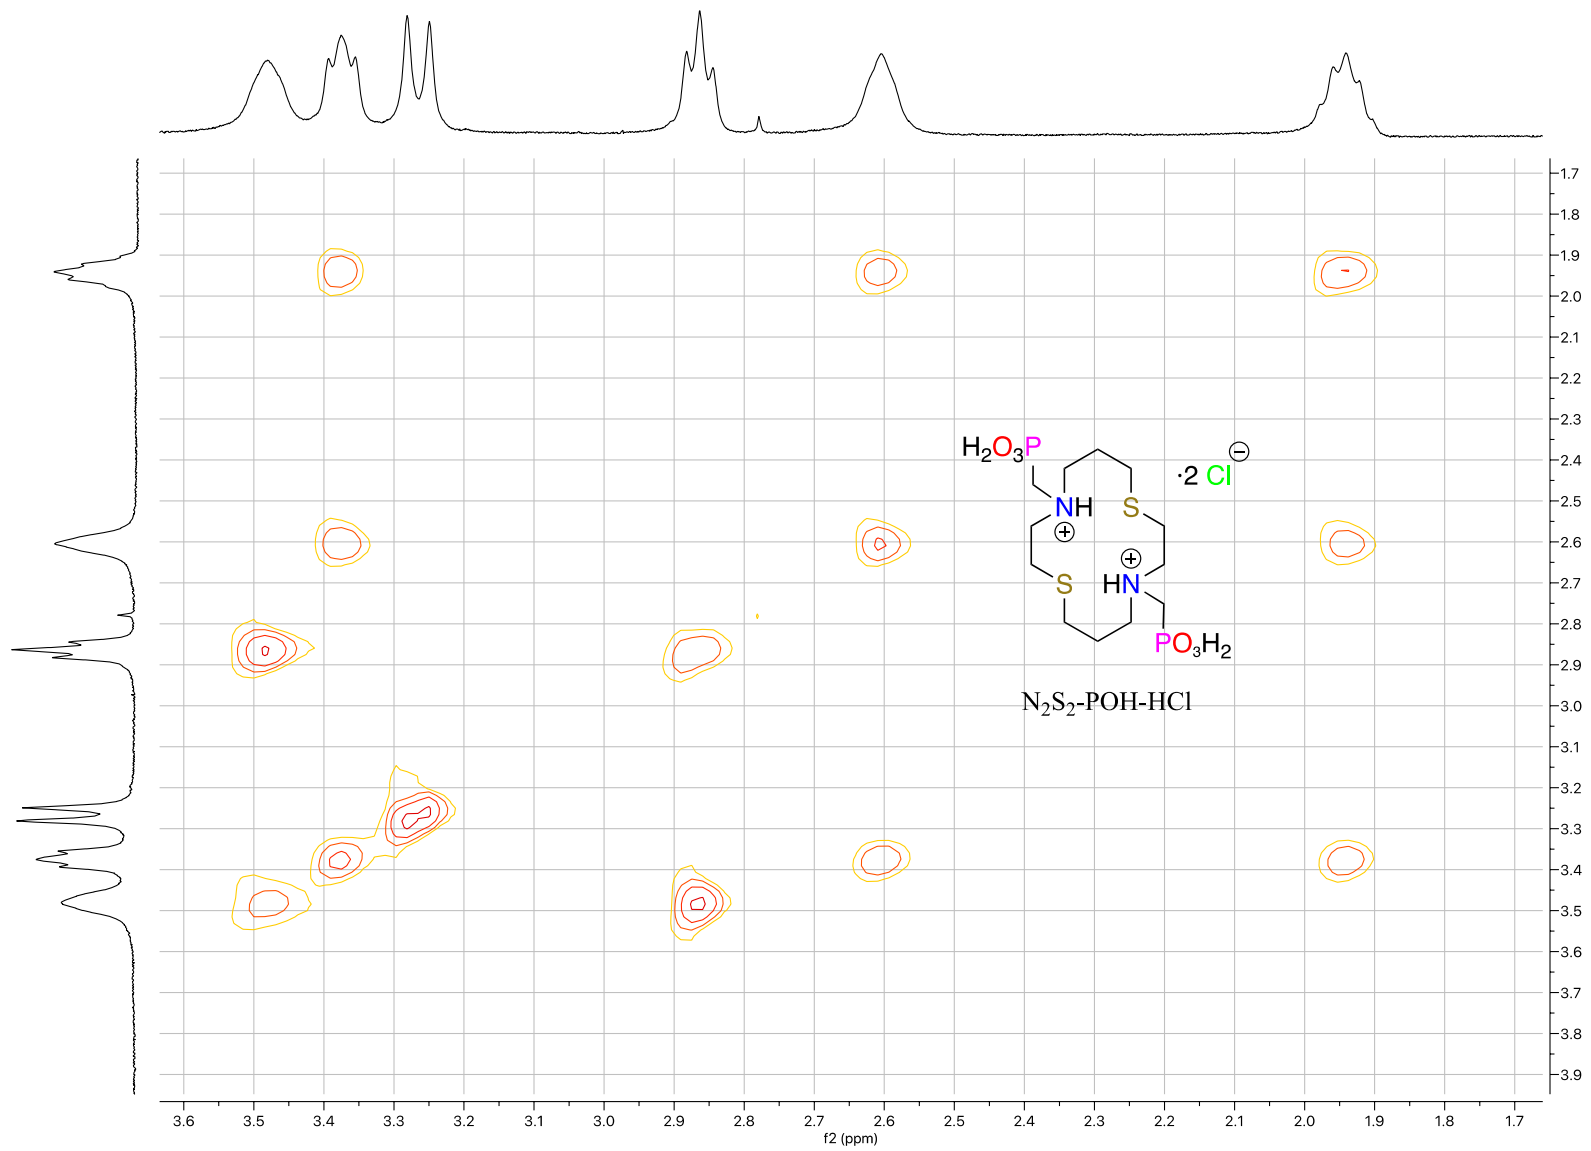

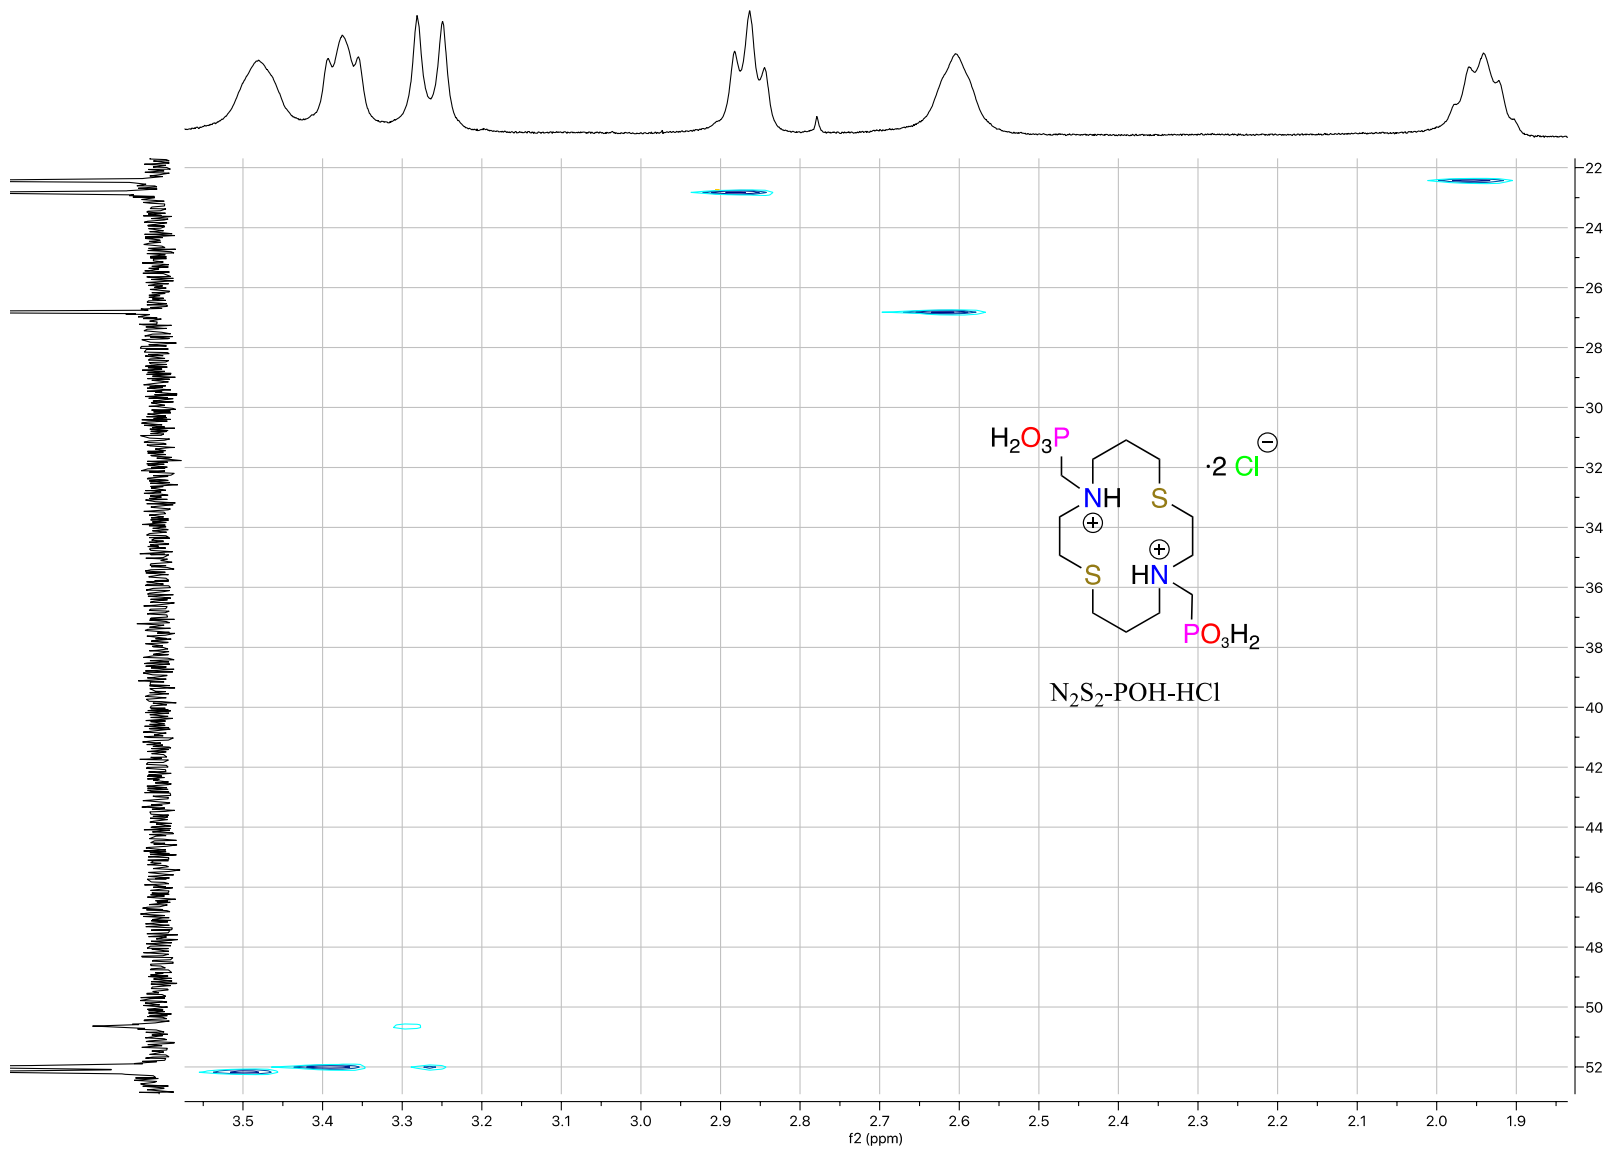



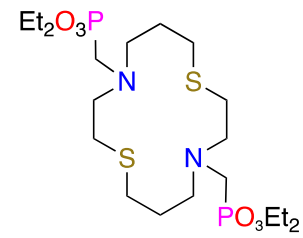

N<sub>2</sub>S<sub>2</sub>-POEt

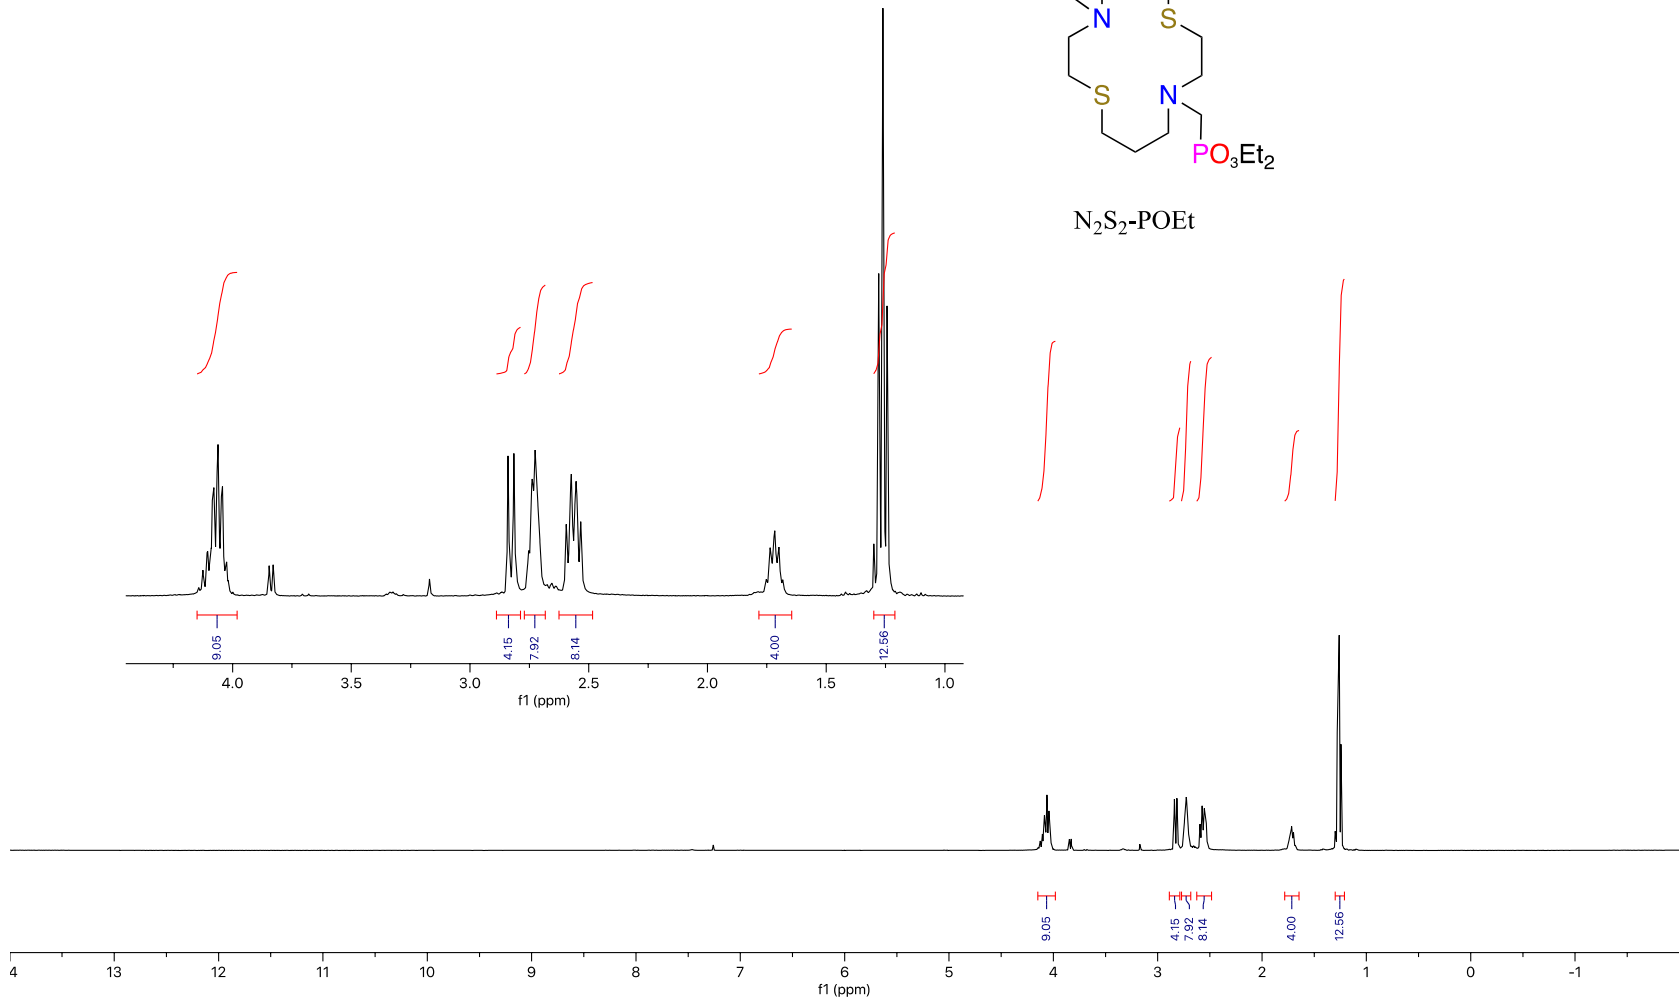

61.85  
61.78  
53.92  
53.86  
53.64  
53.59  
51.34  
49.76  
28.99  
28.80  
27.52  
16.54  
16.48

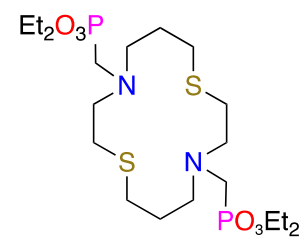

N<sub>2</sub>S<sub>2</sub>-POEt

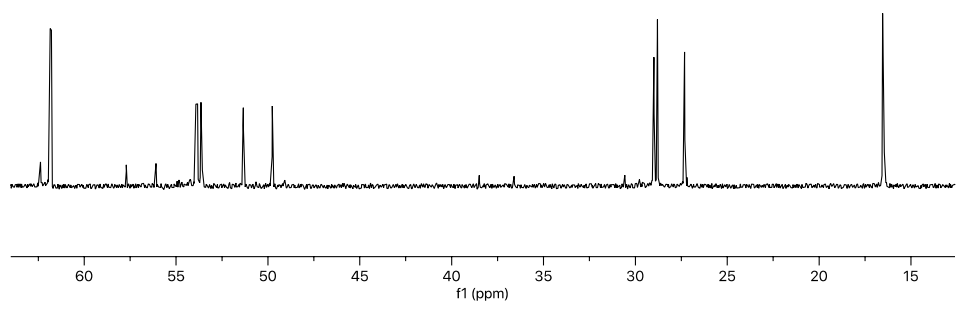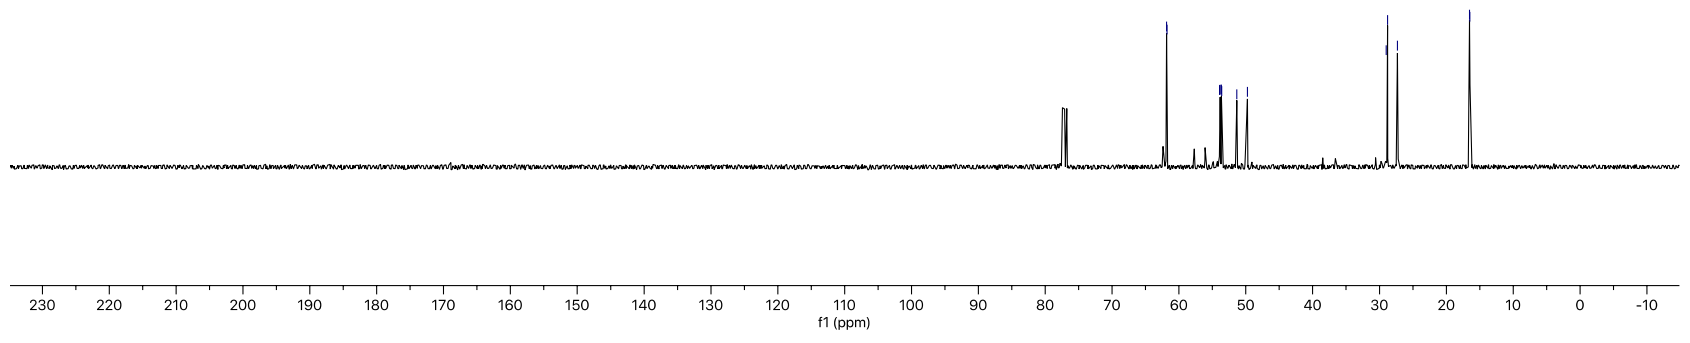

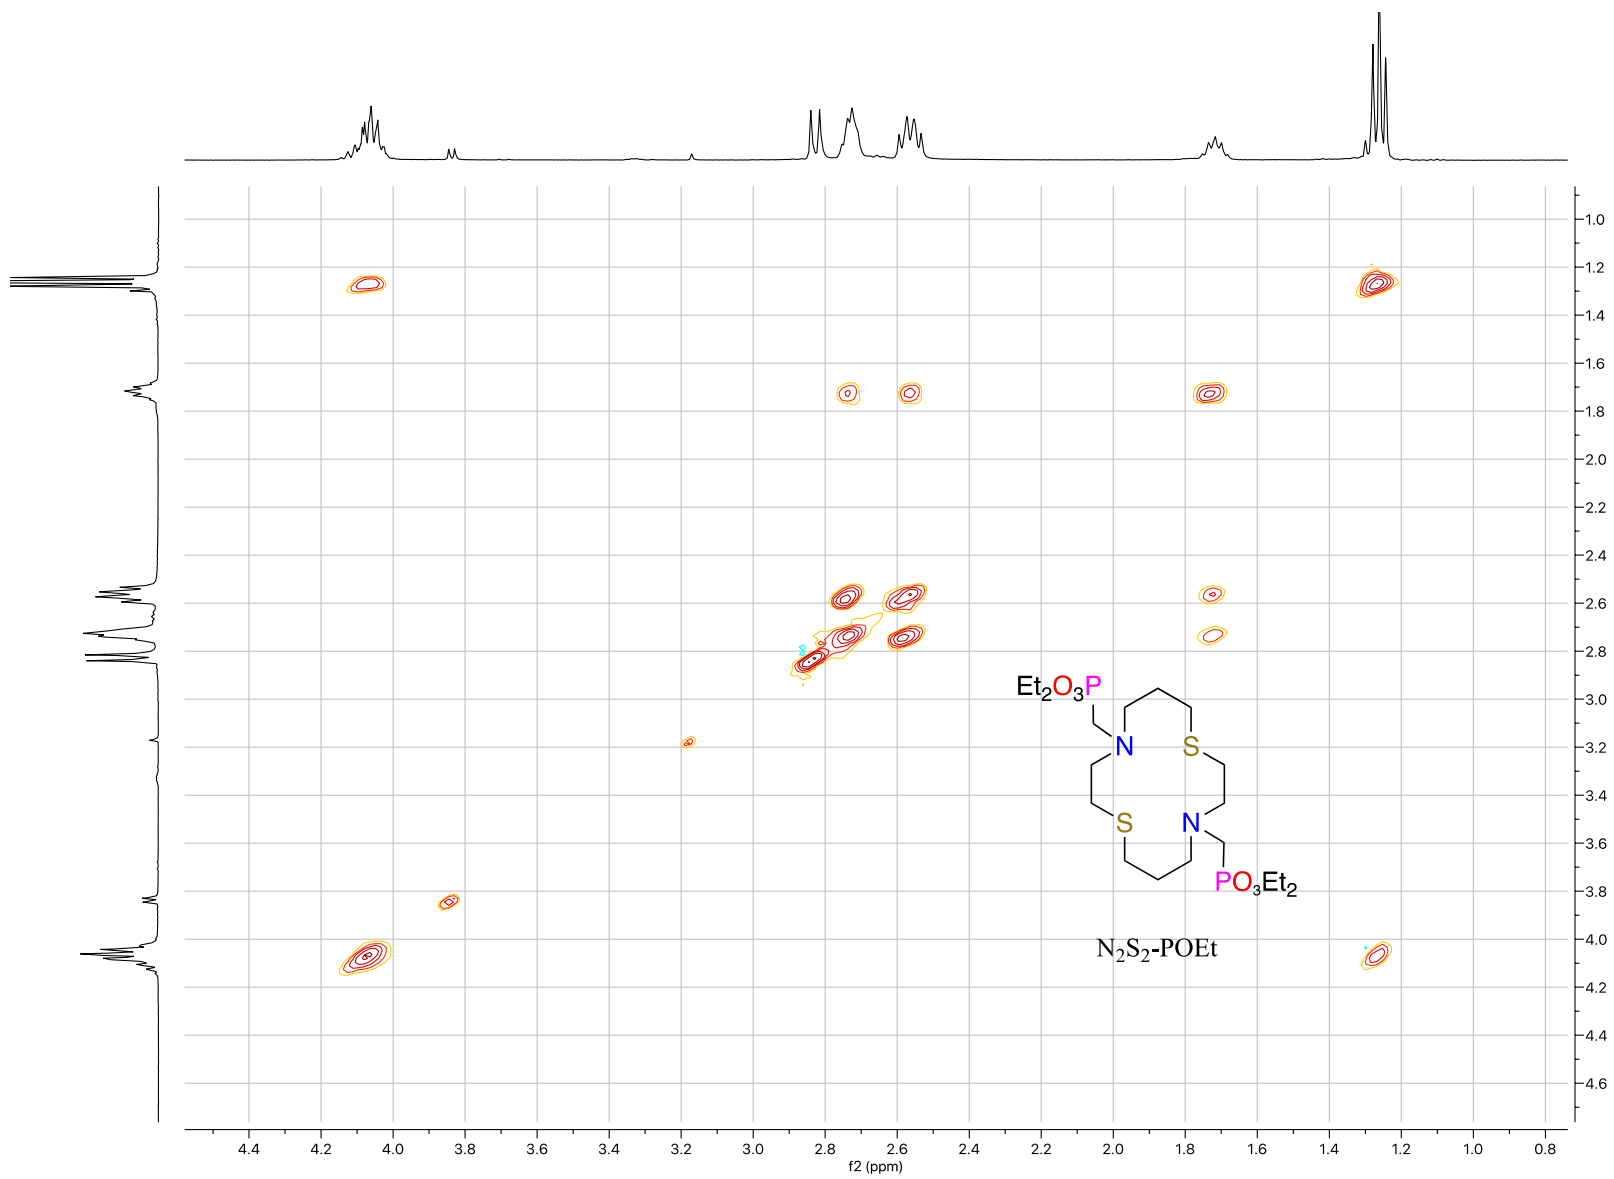

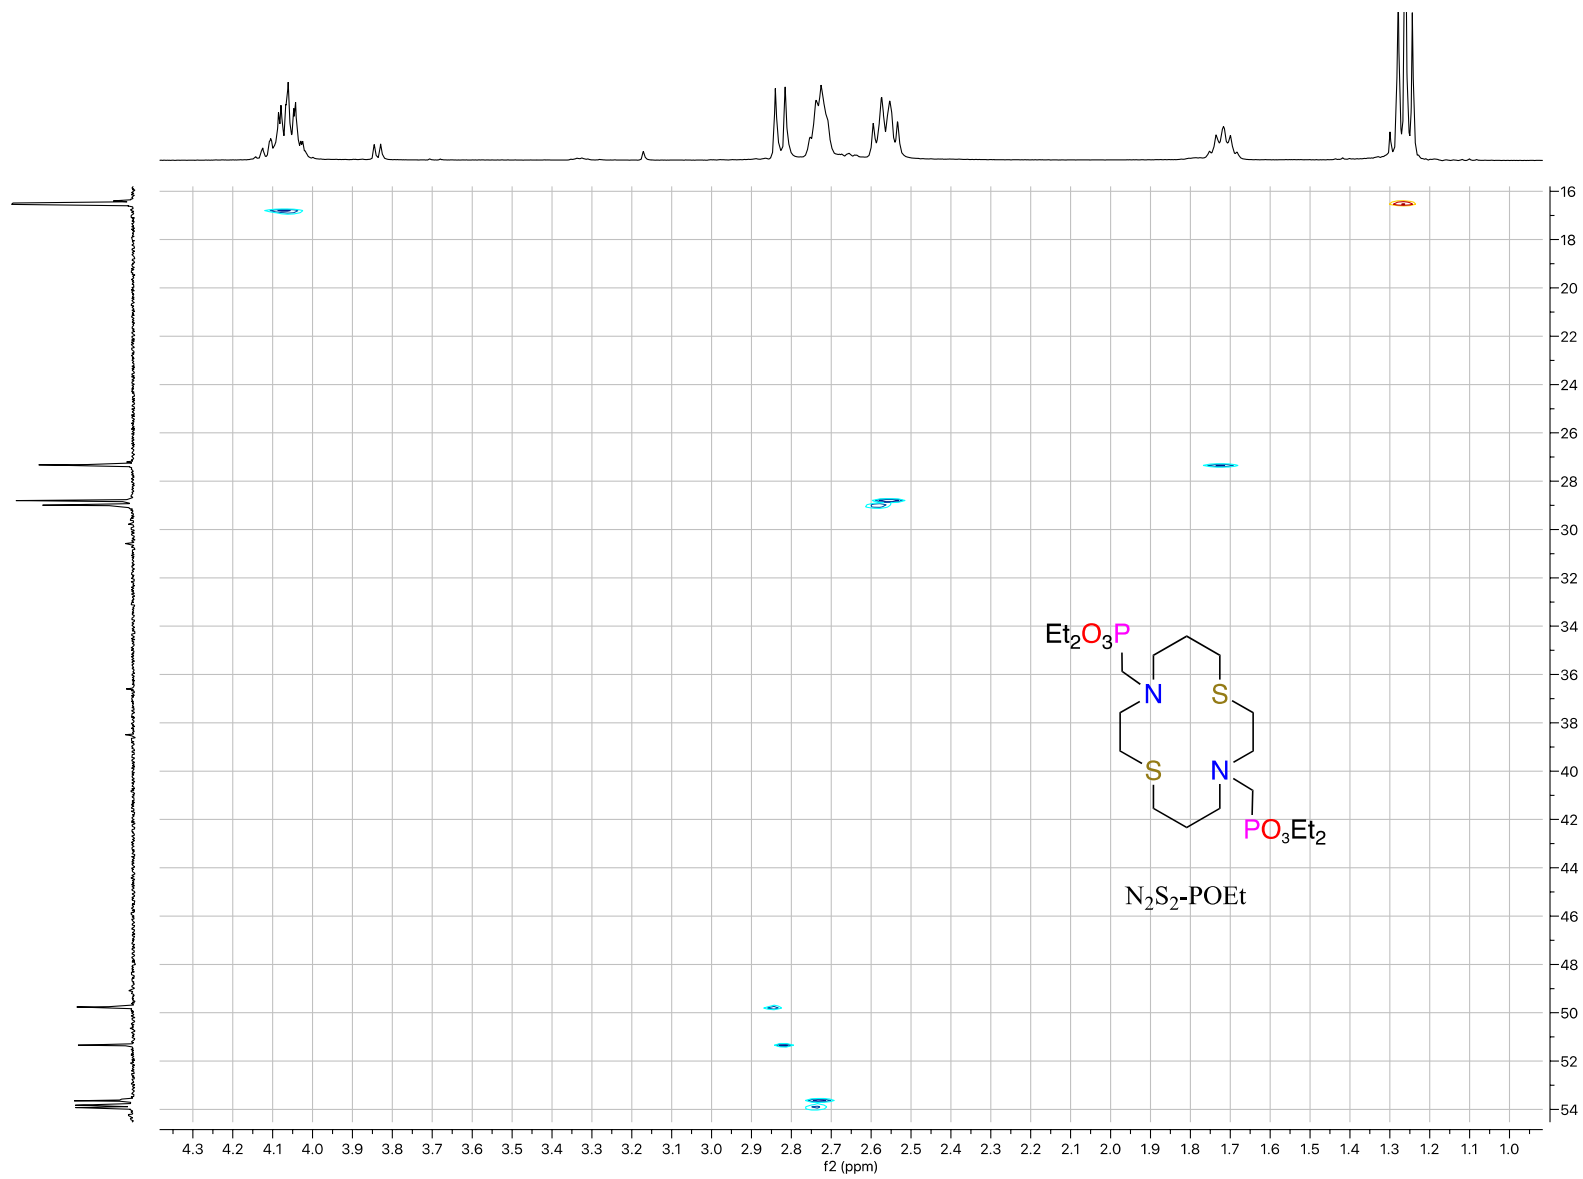

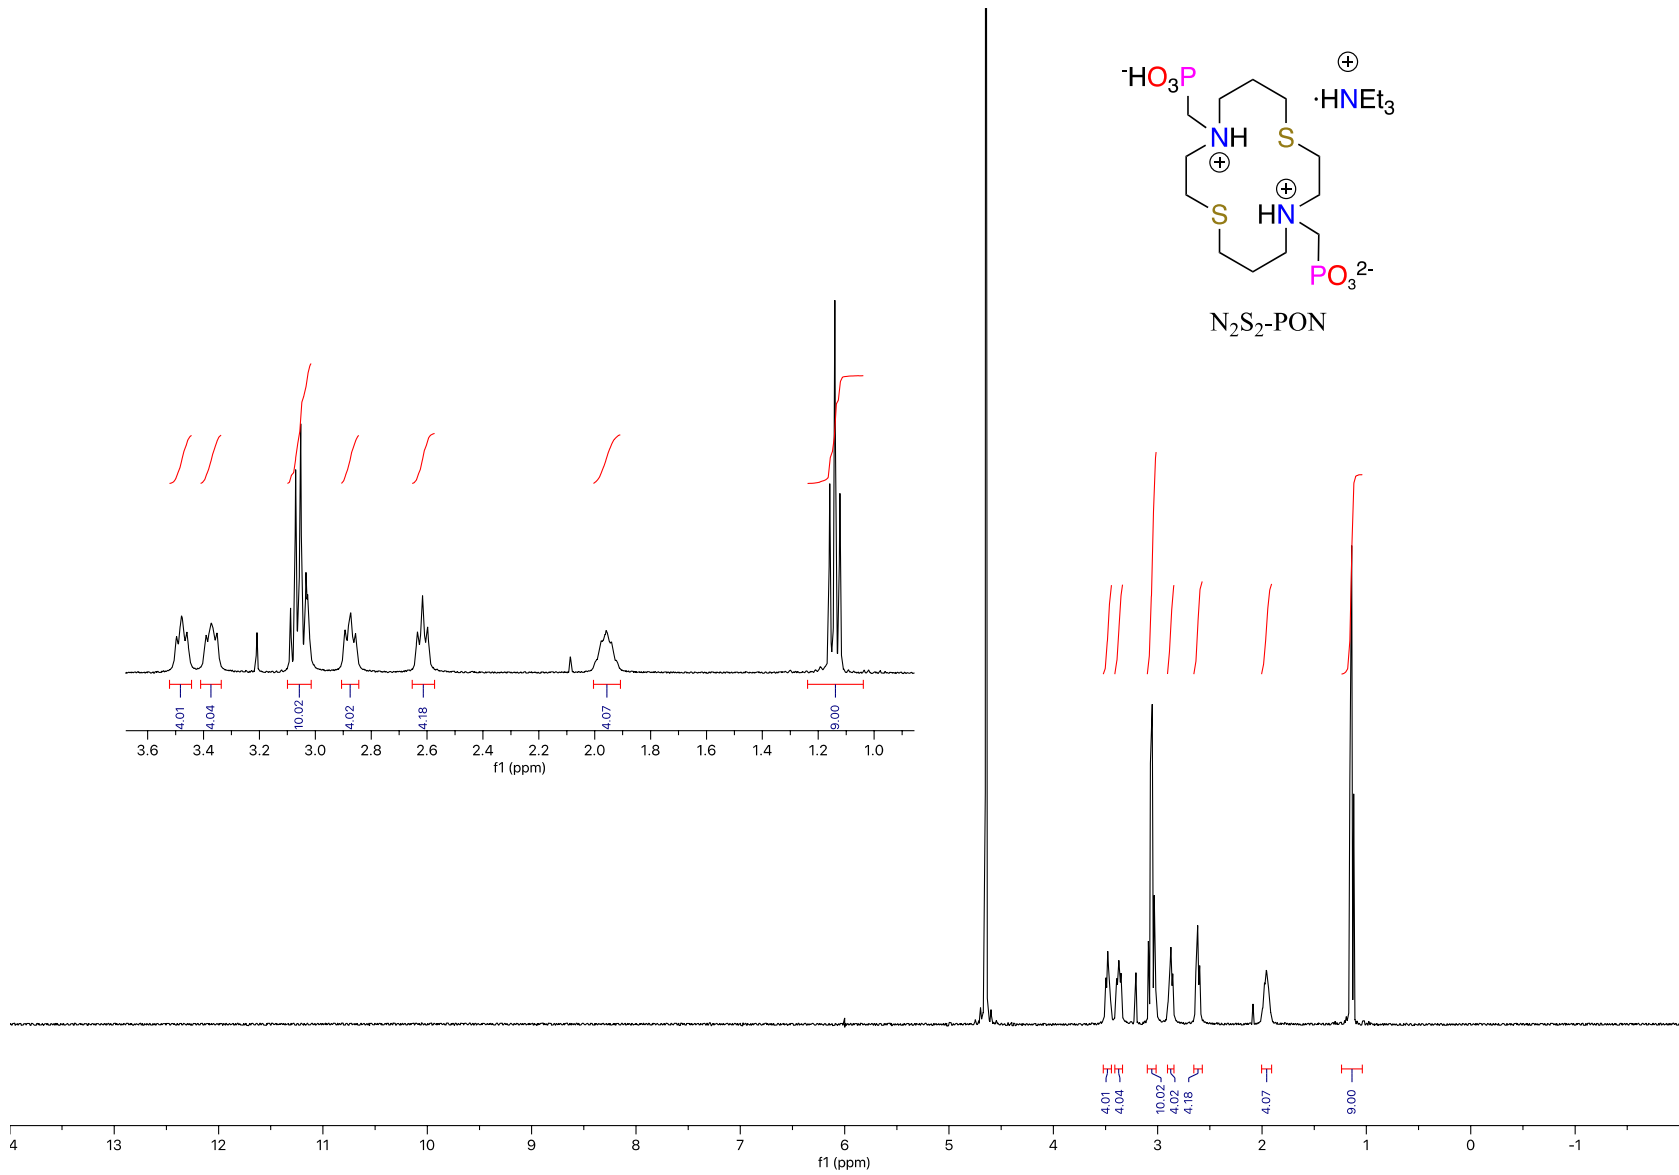

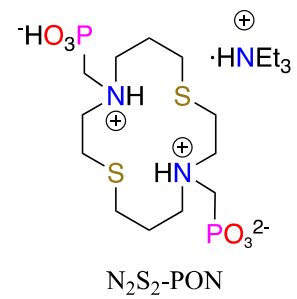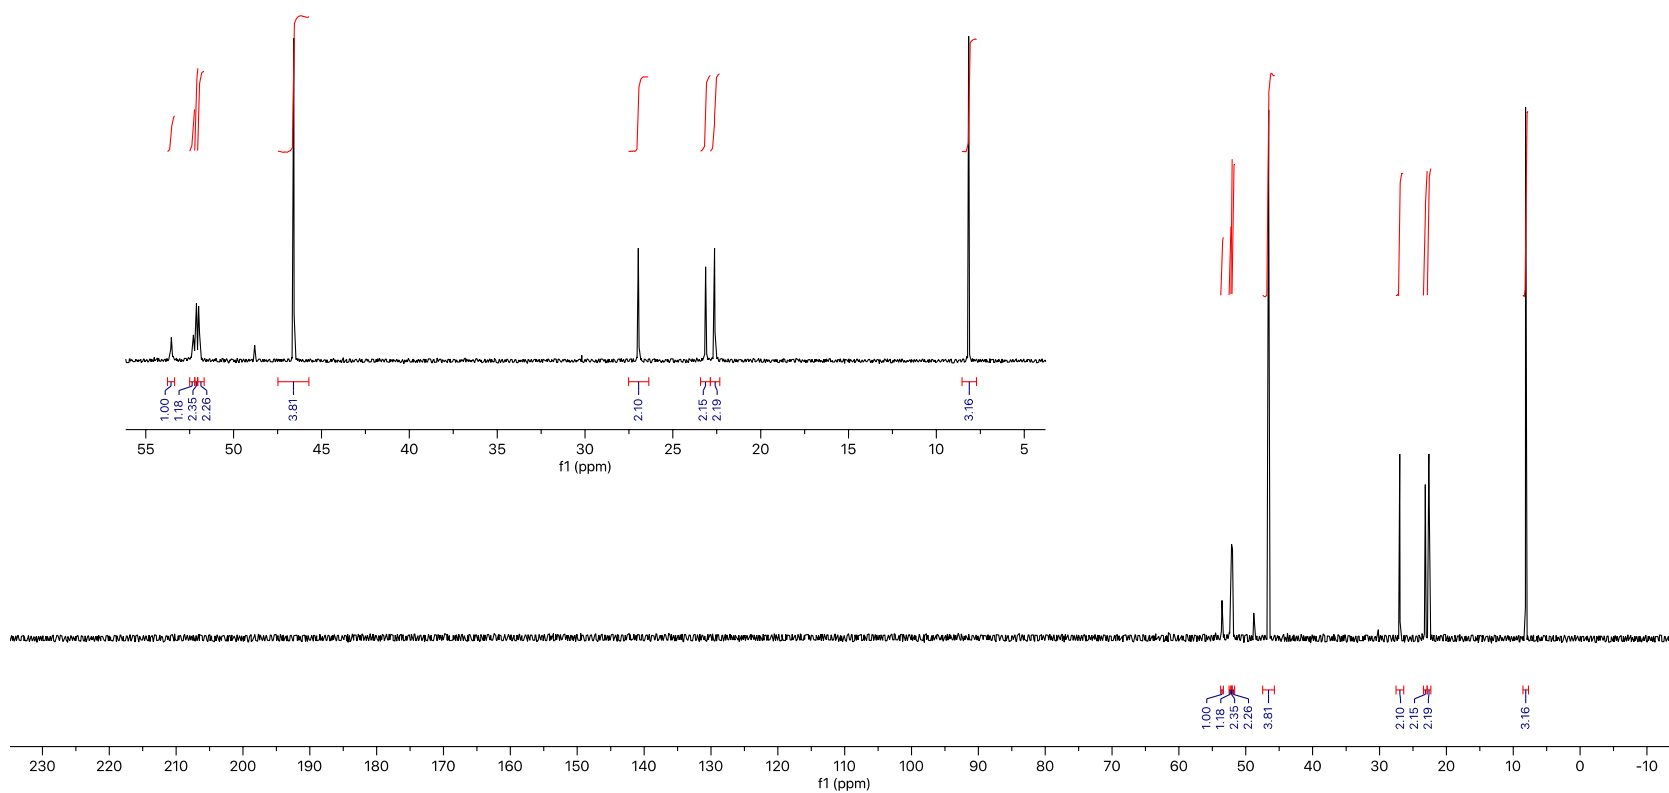

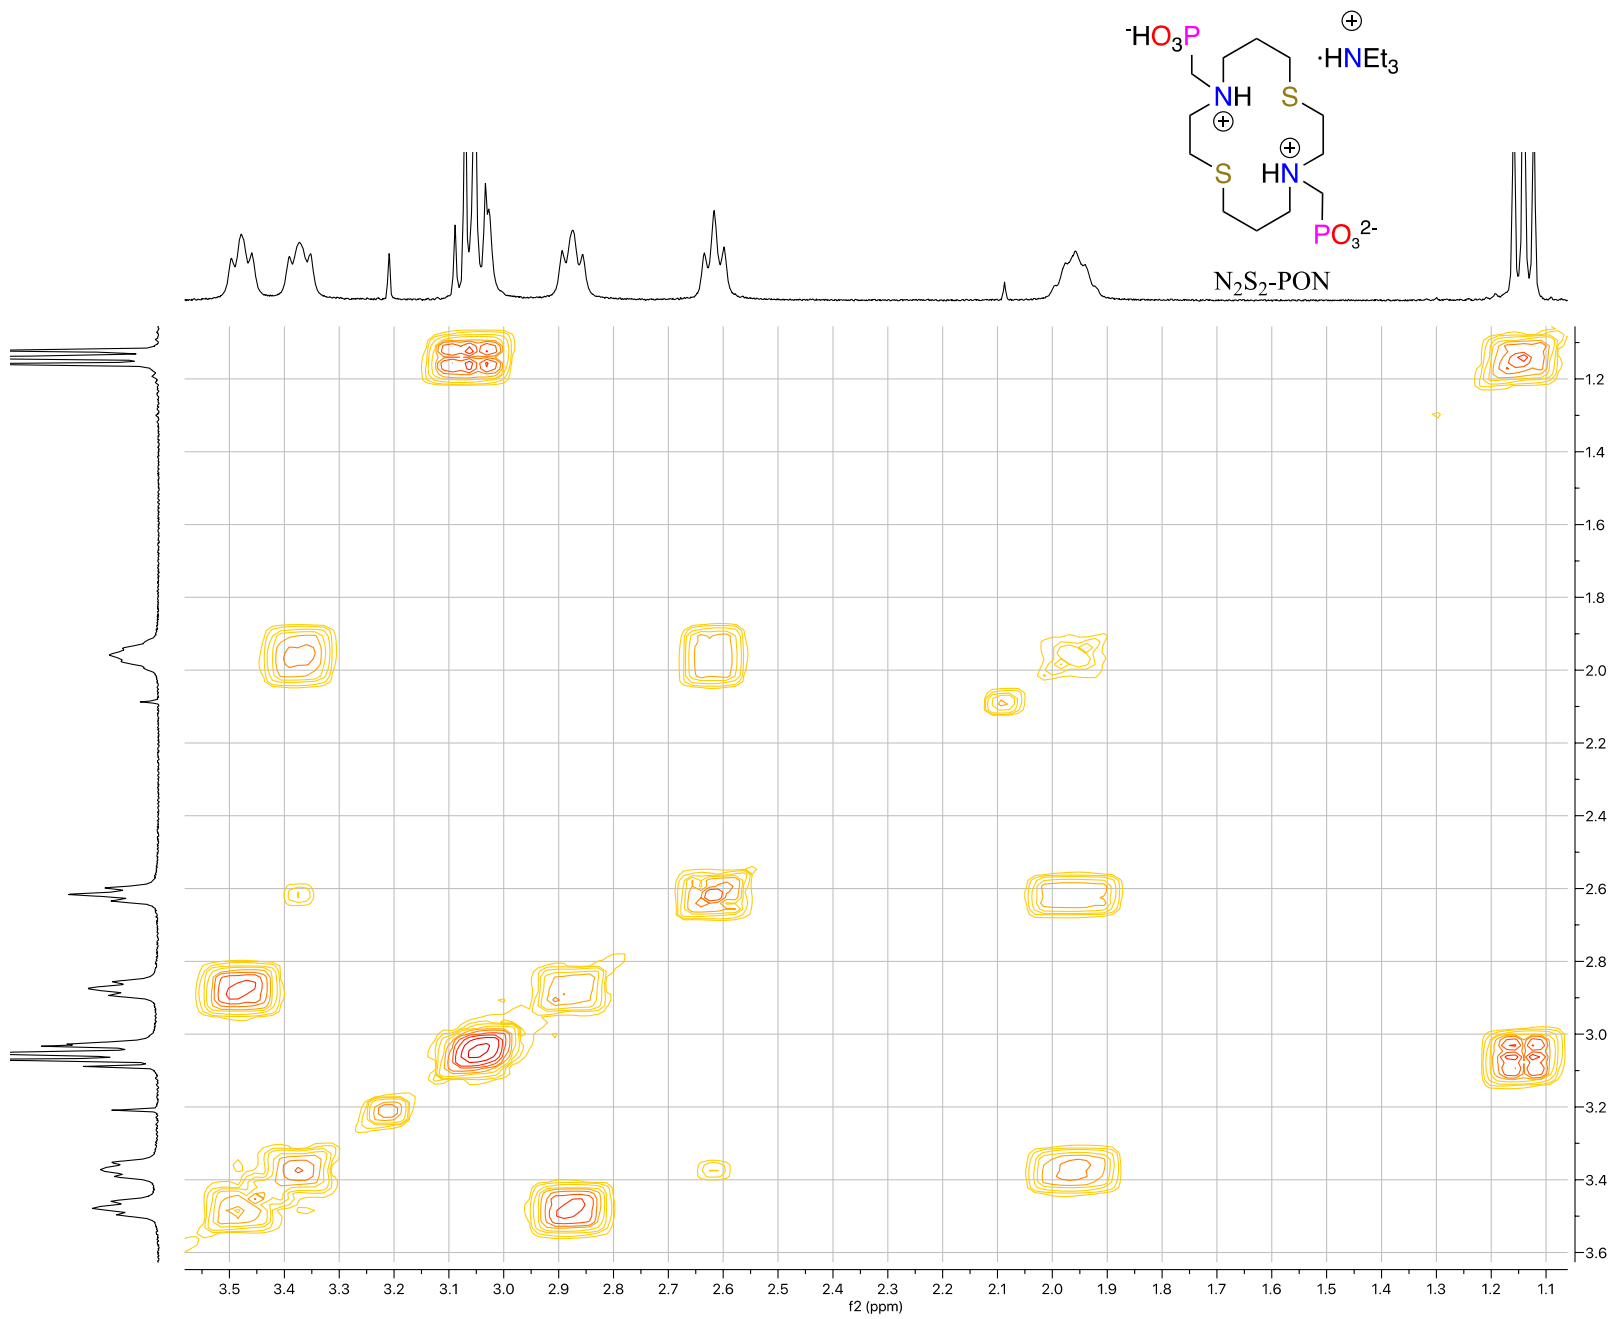

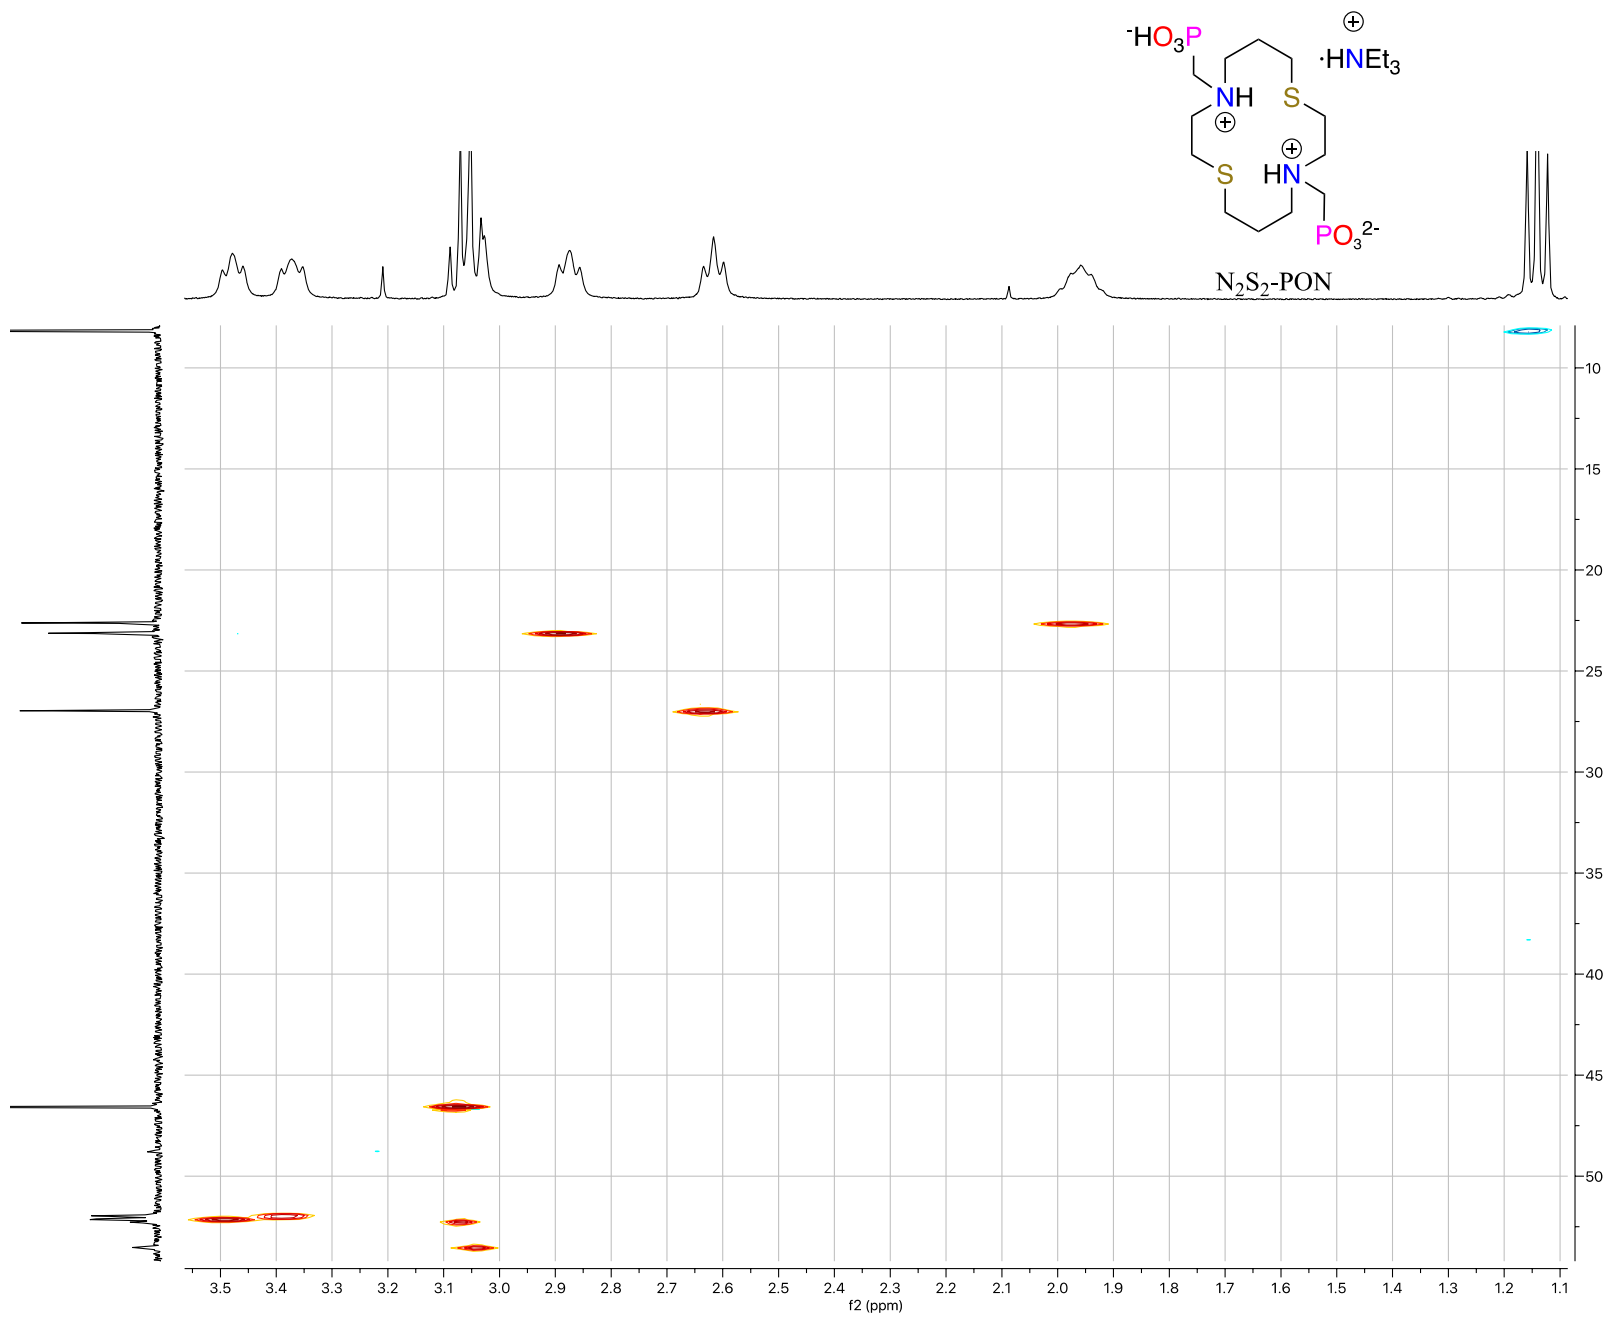



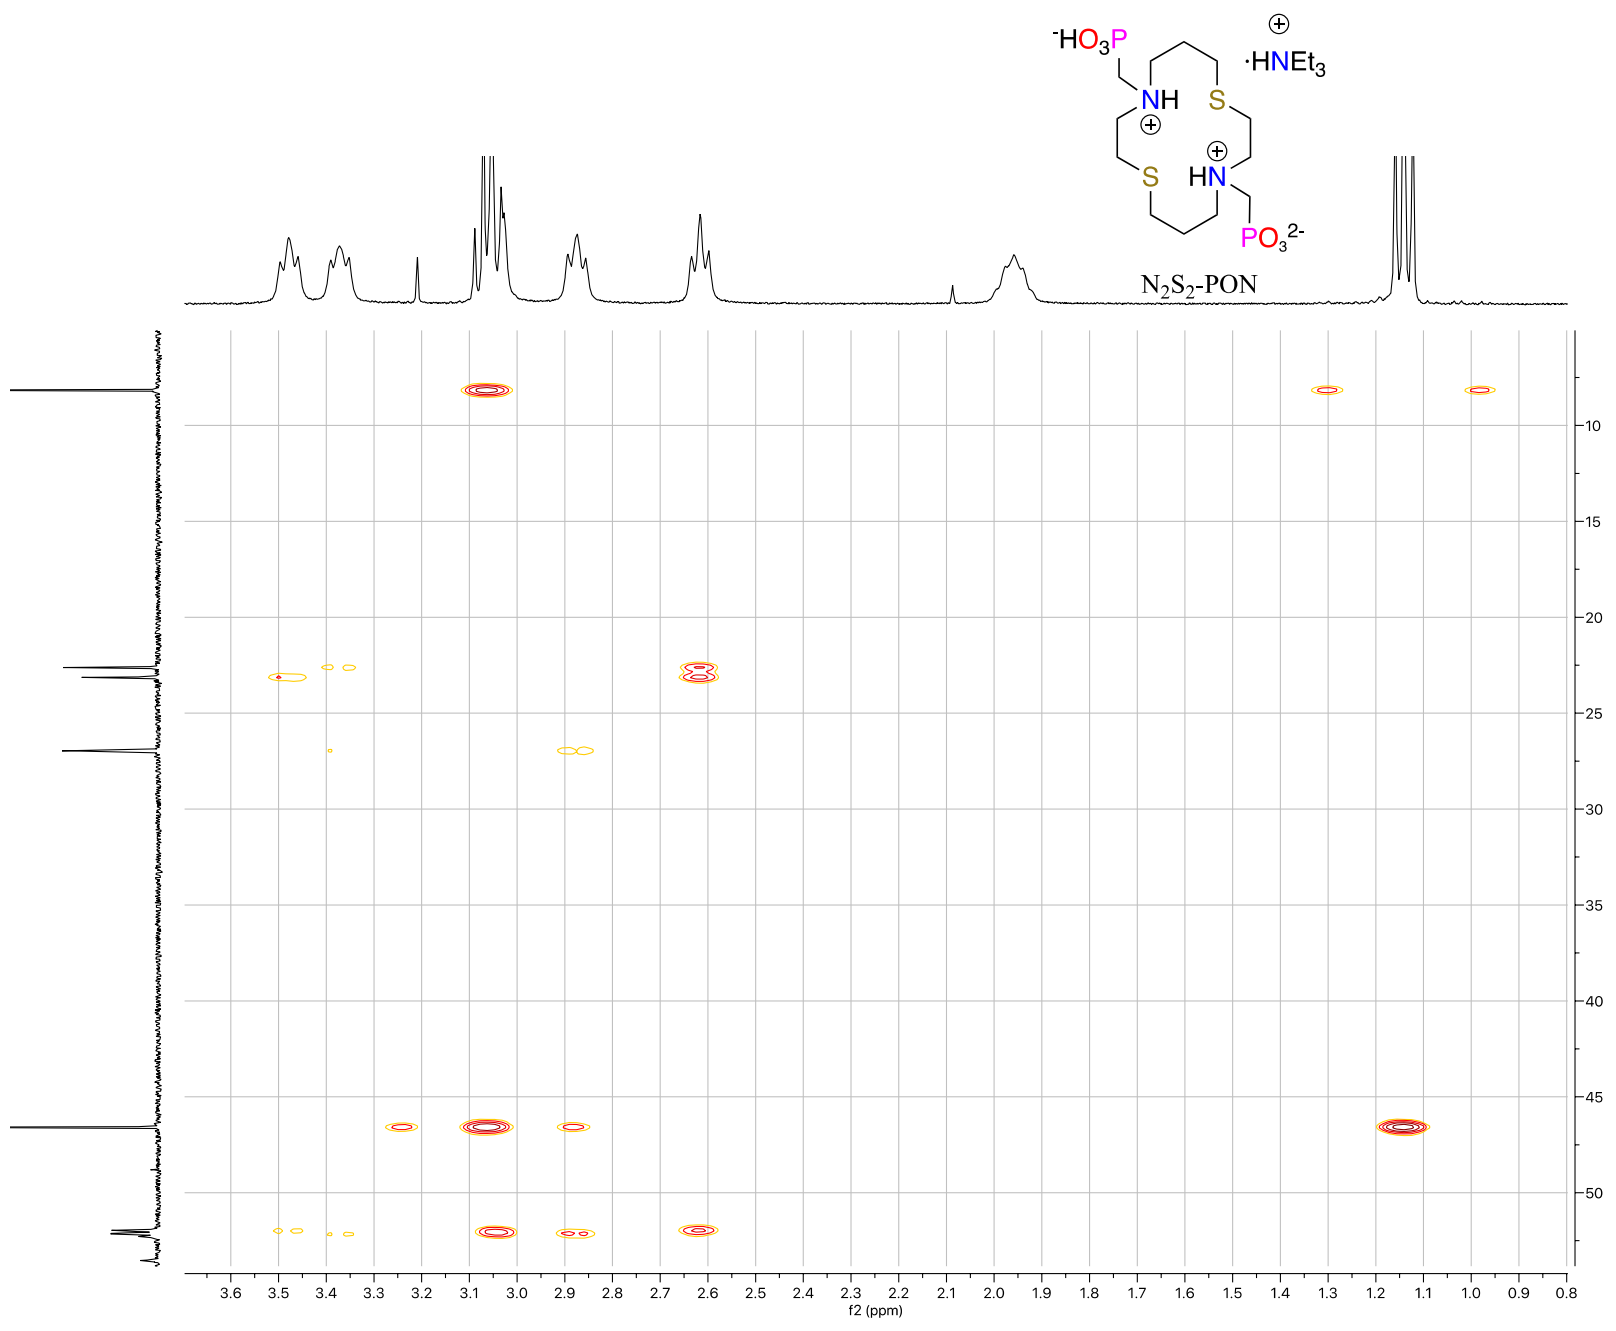

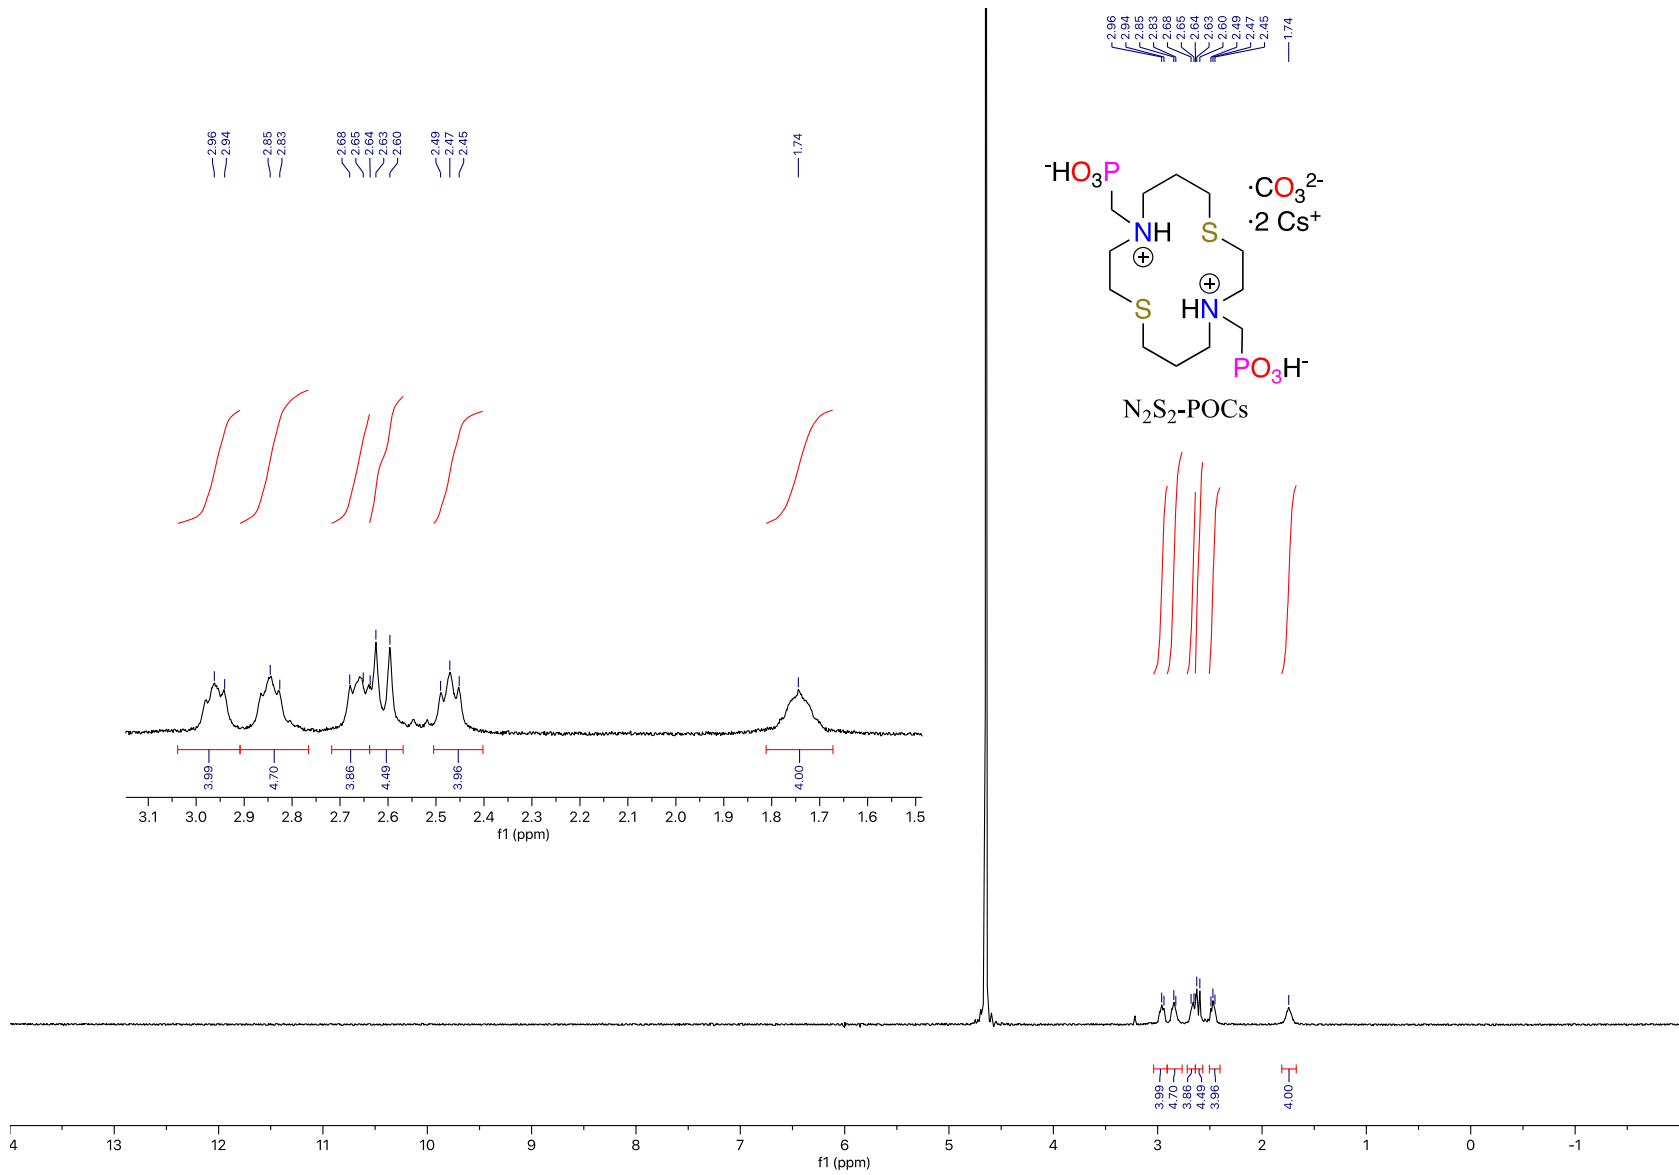

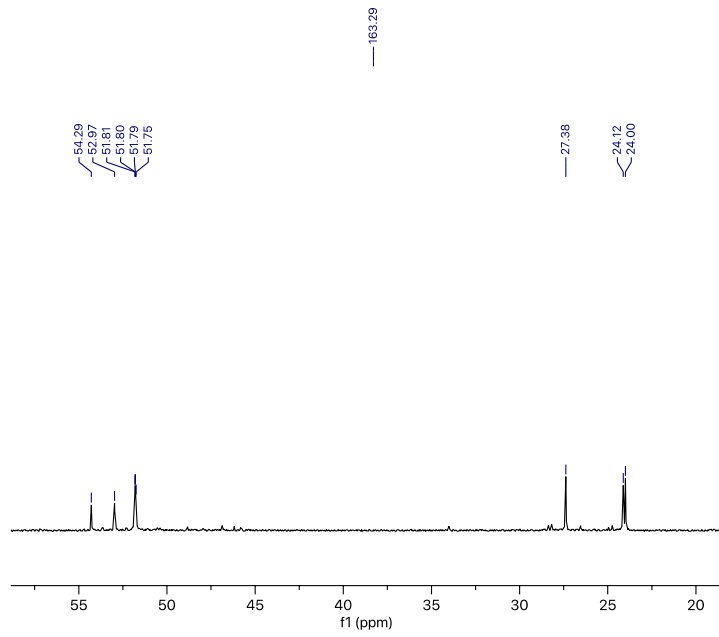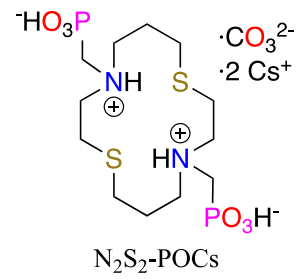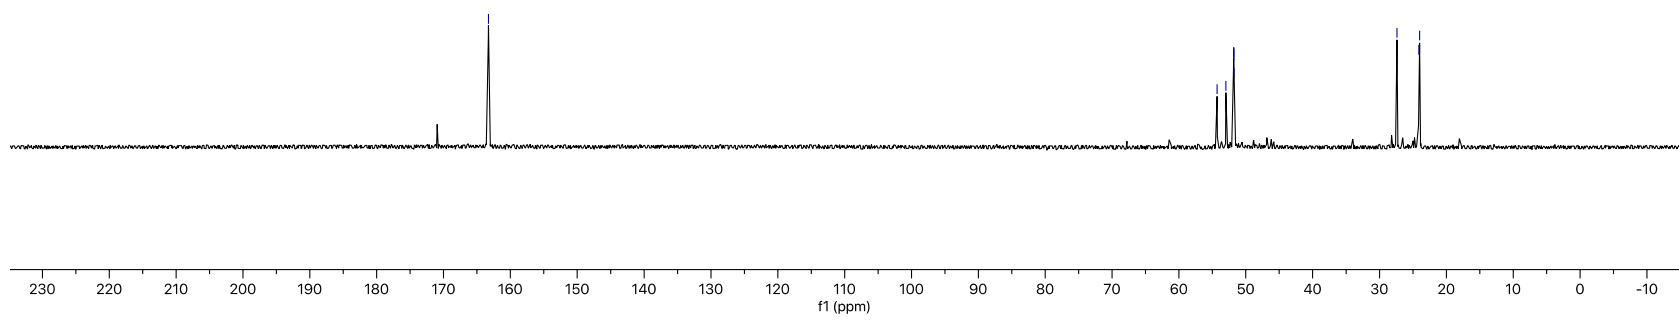

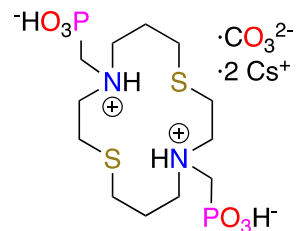

N<sub>2</sub>S<sub>2</sub>-POCs

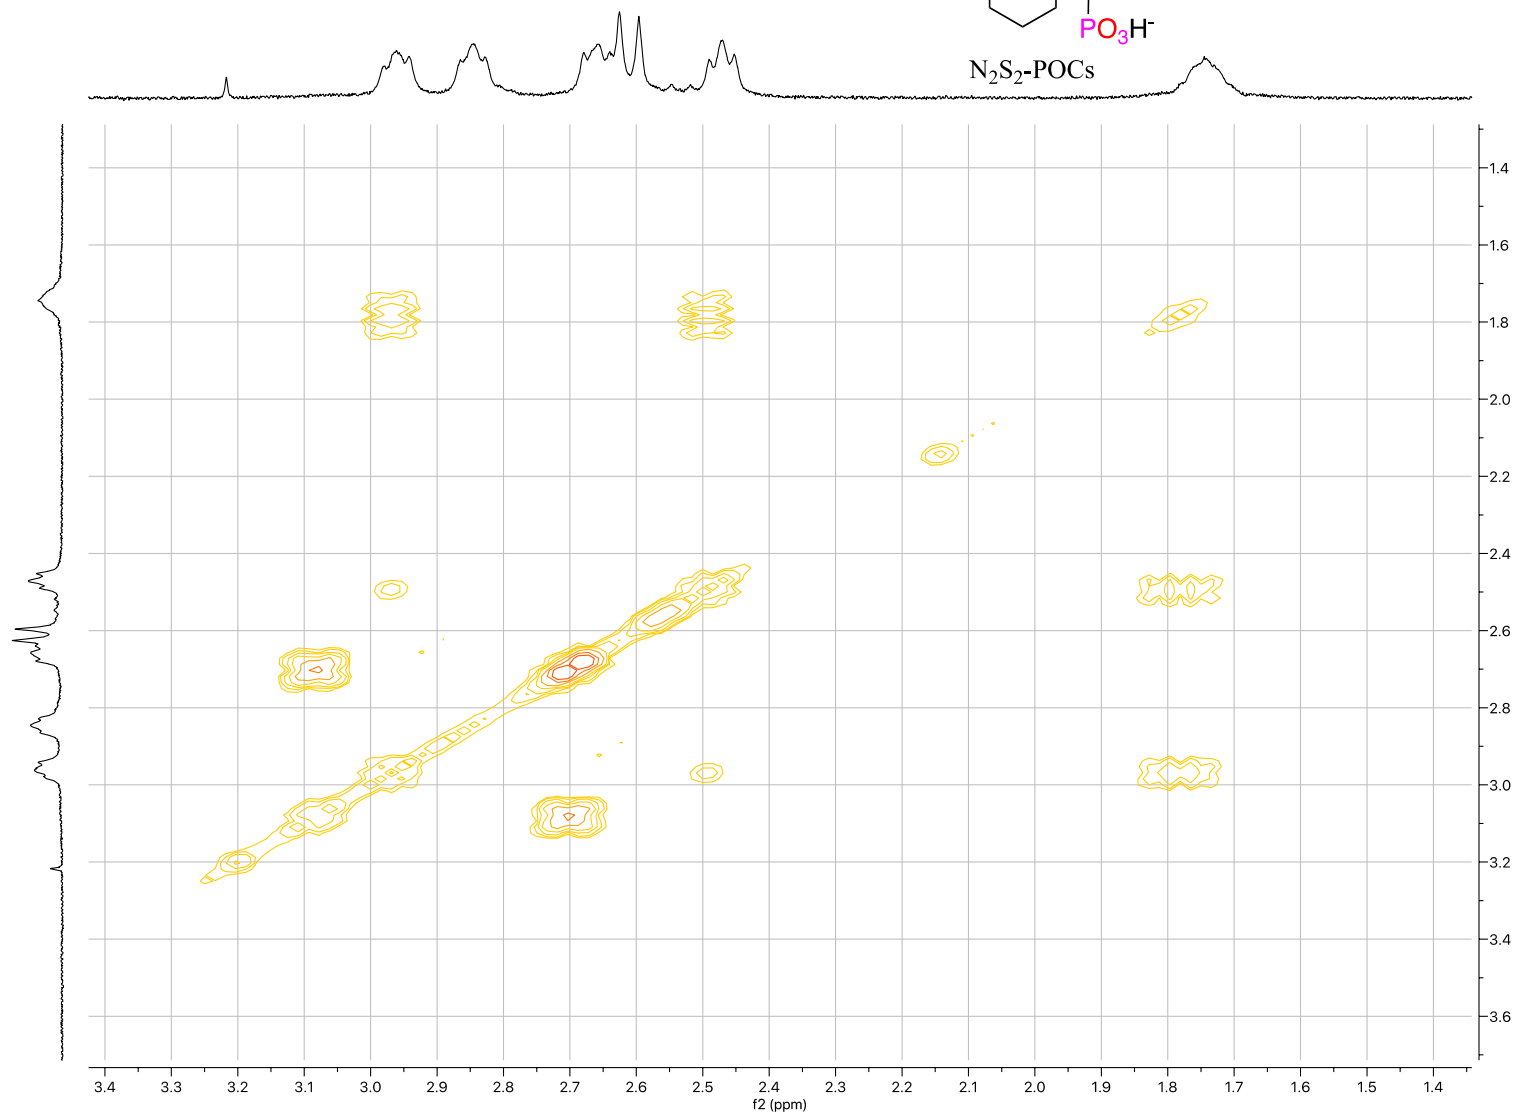

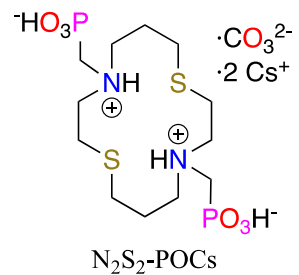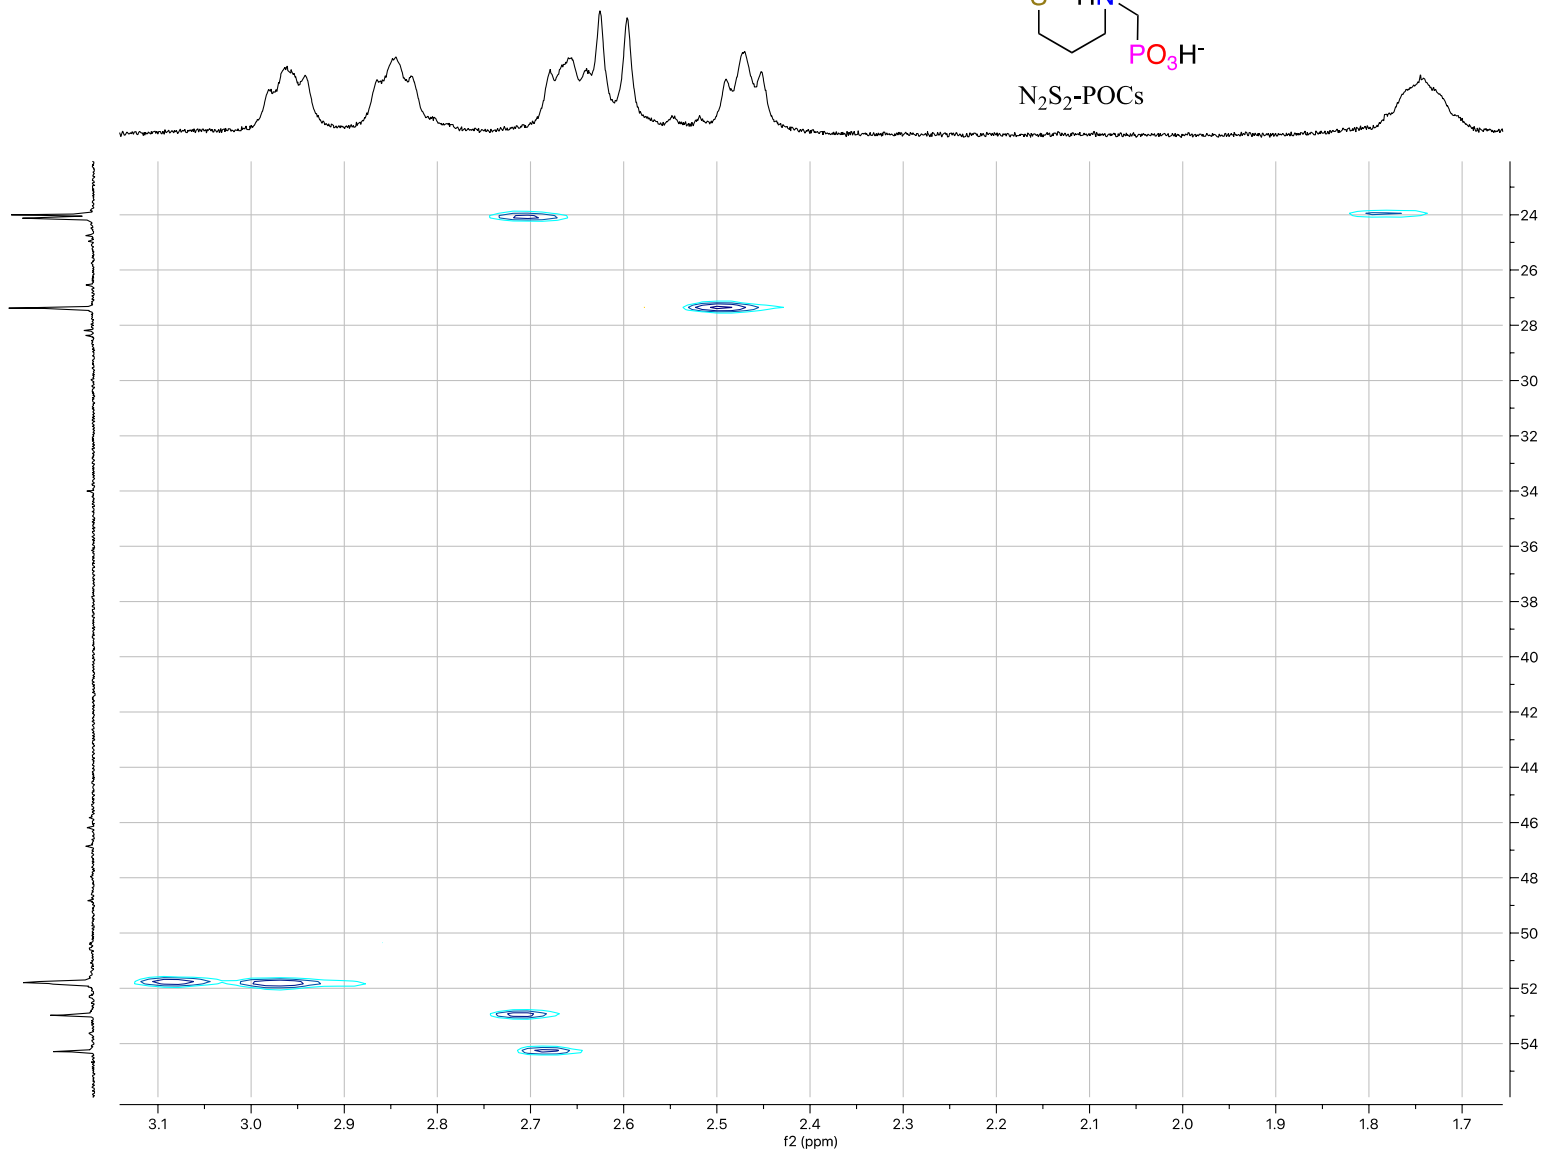

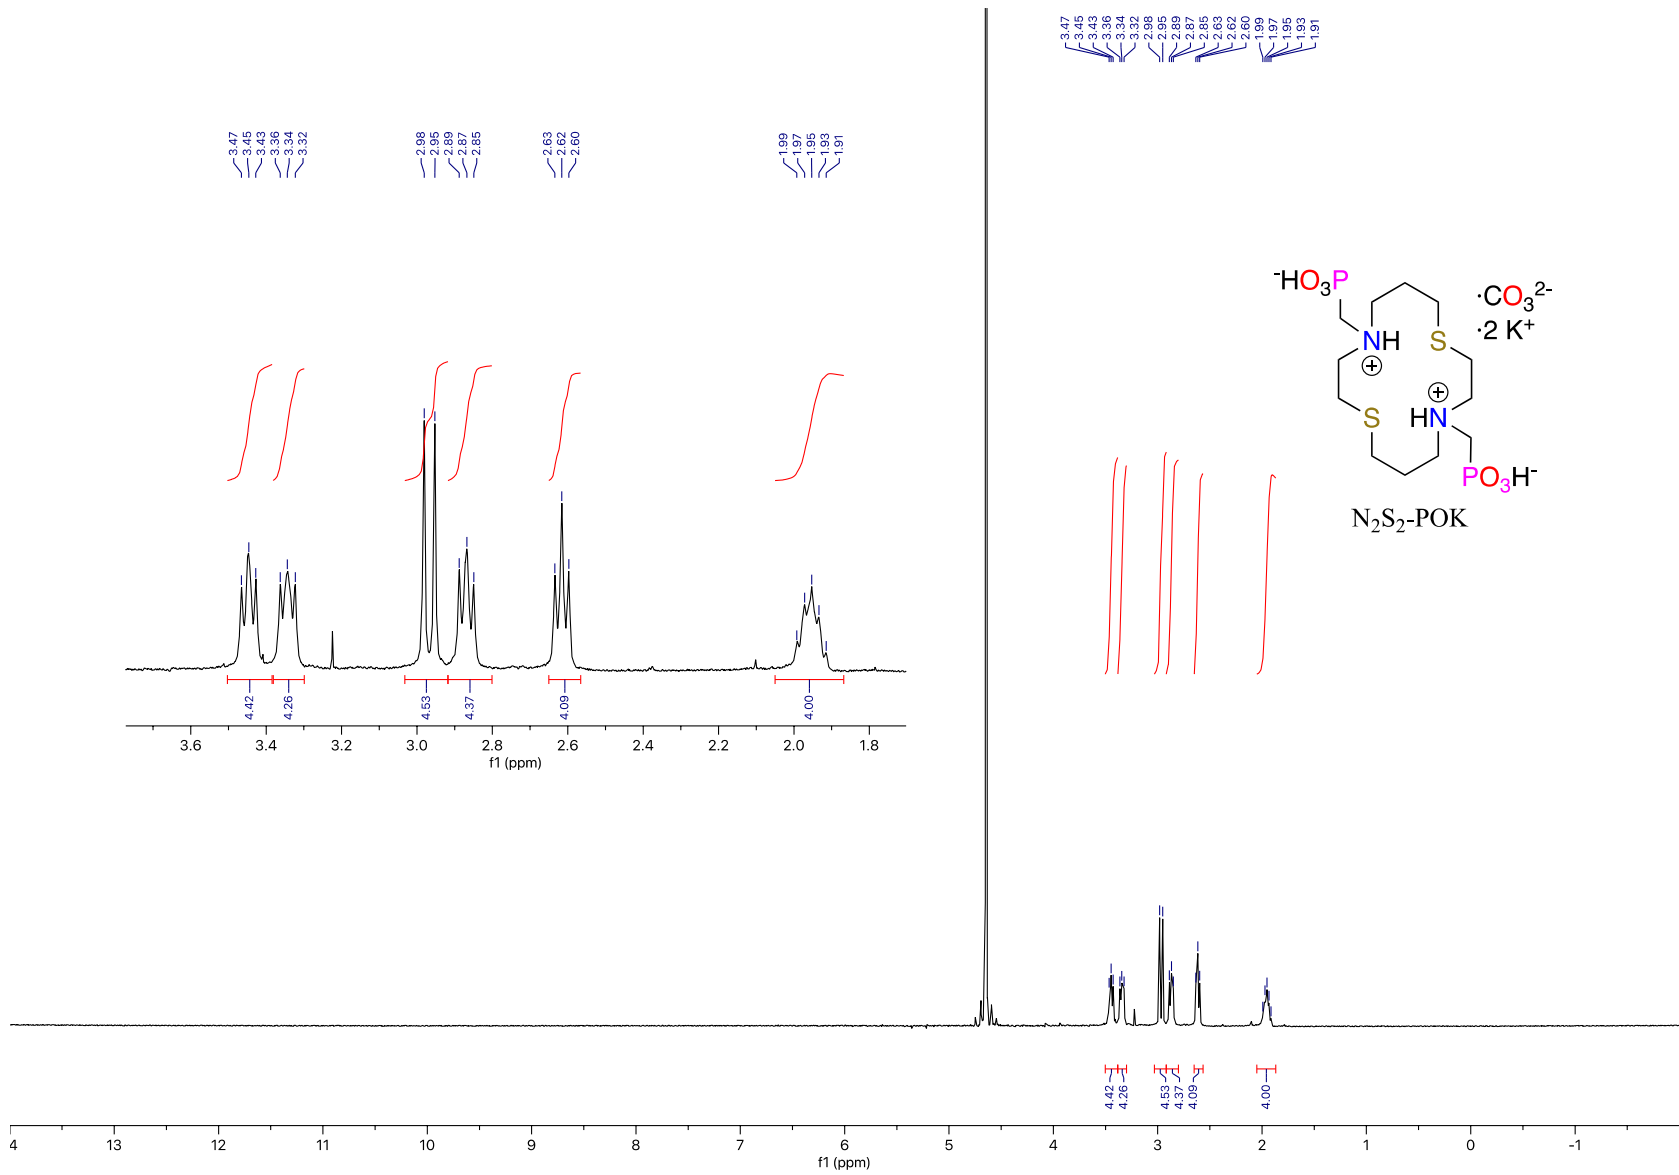

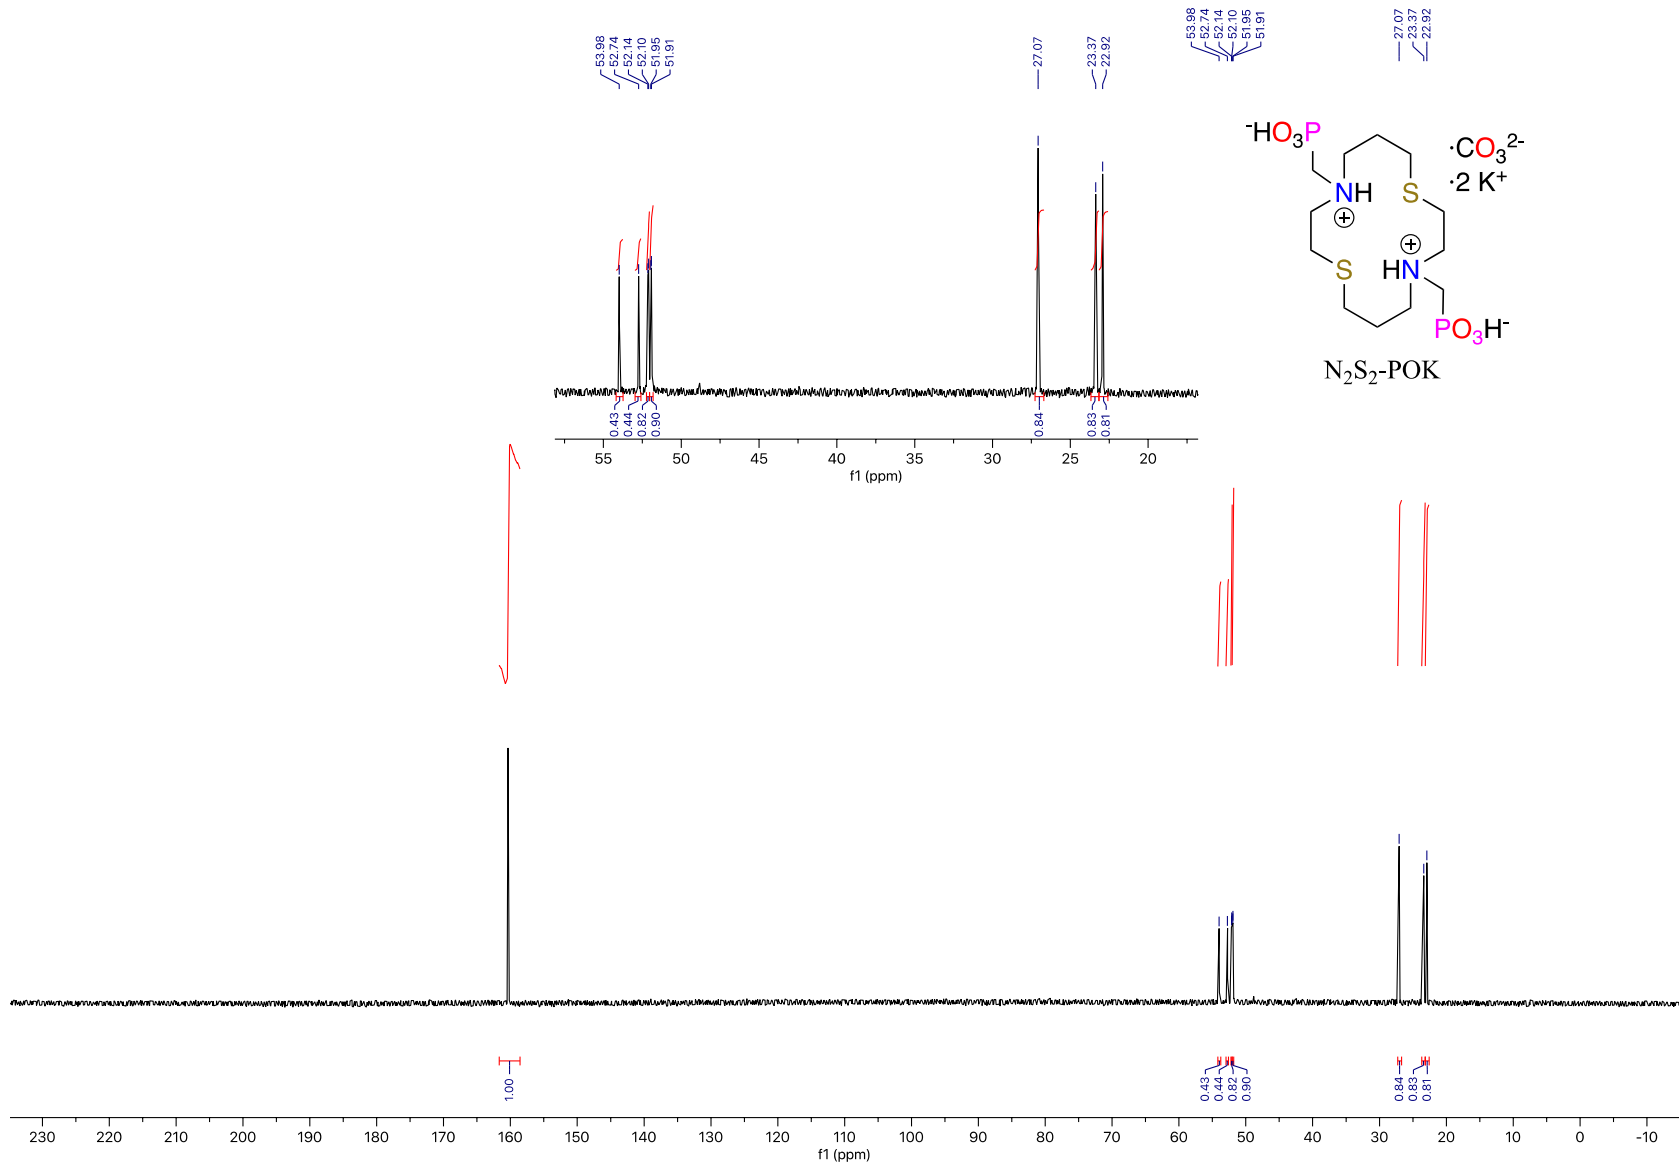

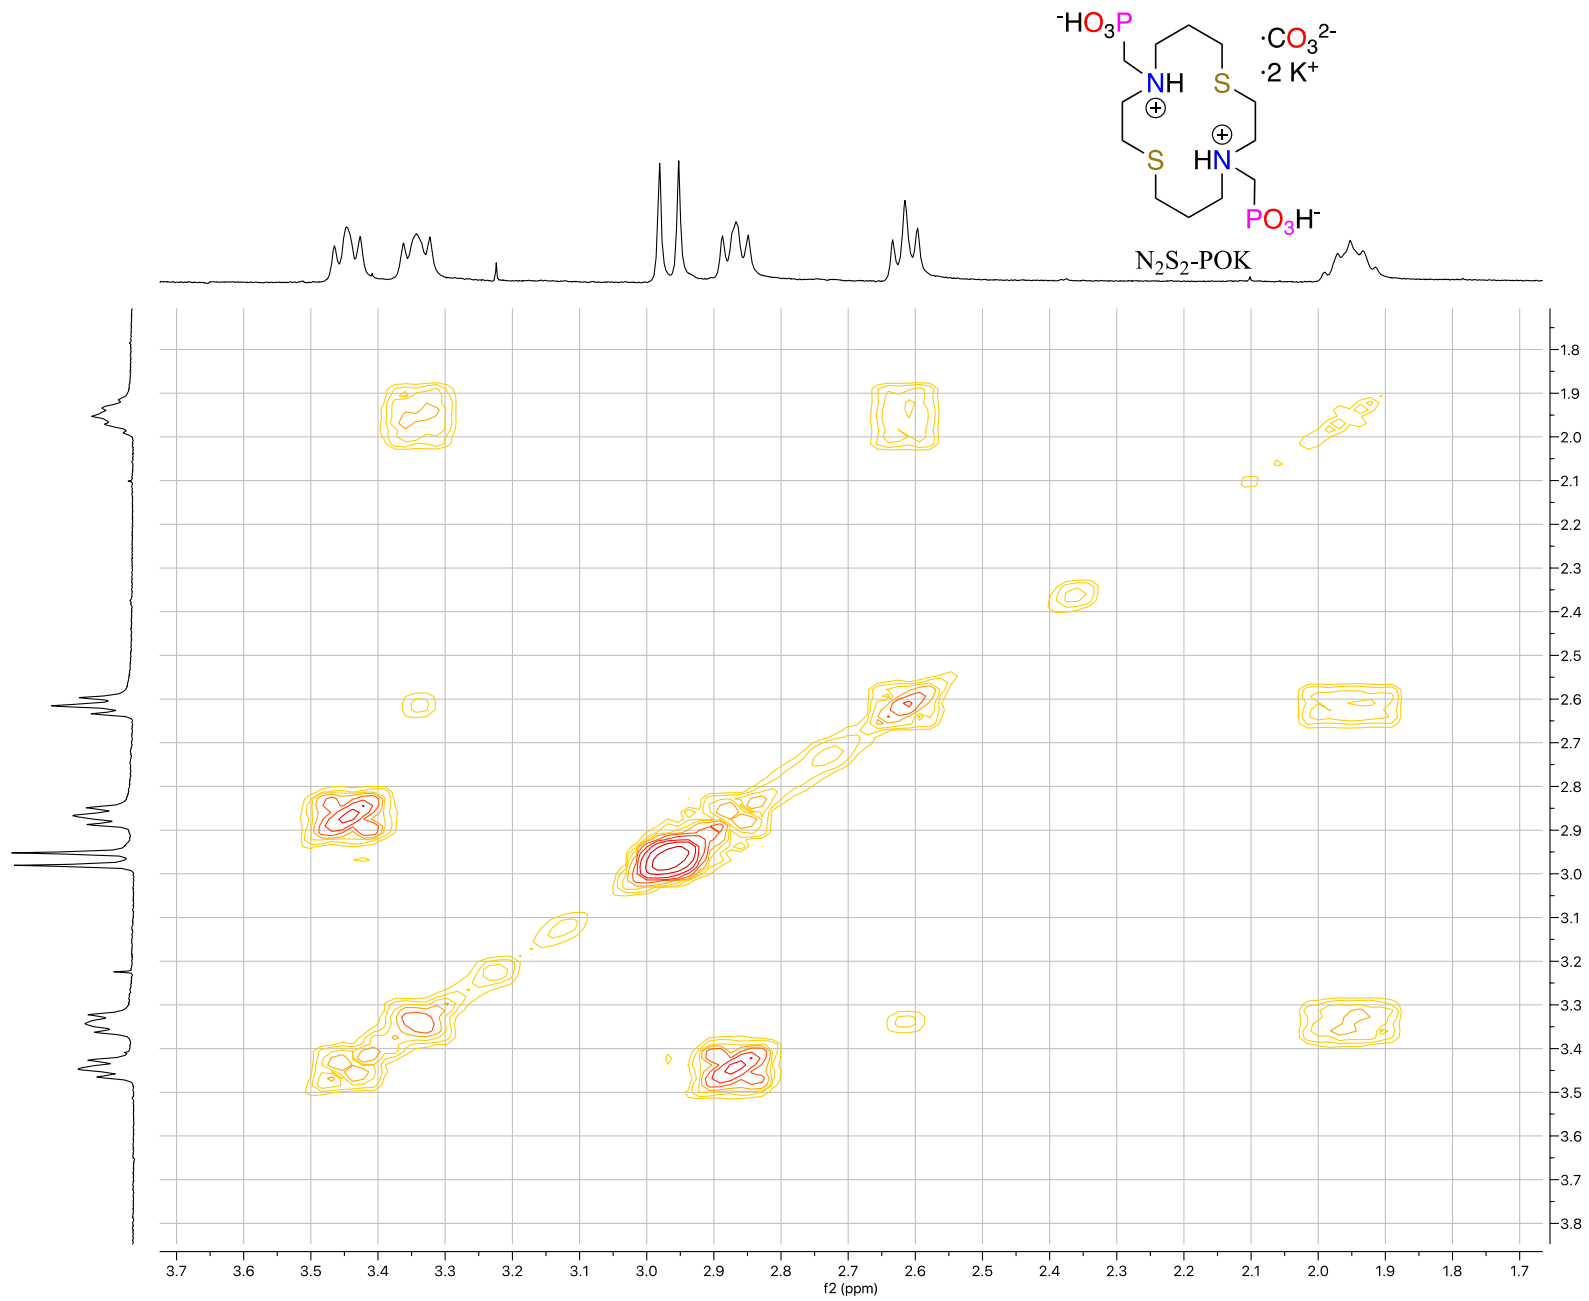



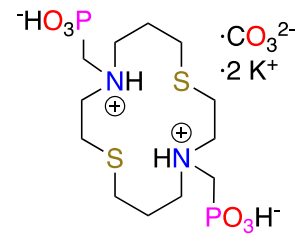

N<sub>2</sub>S<sub>2</sub>-POK

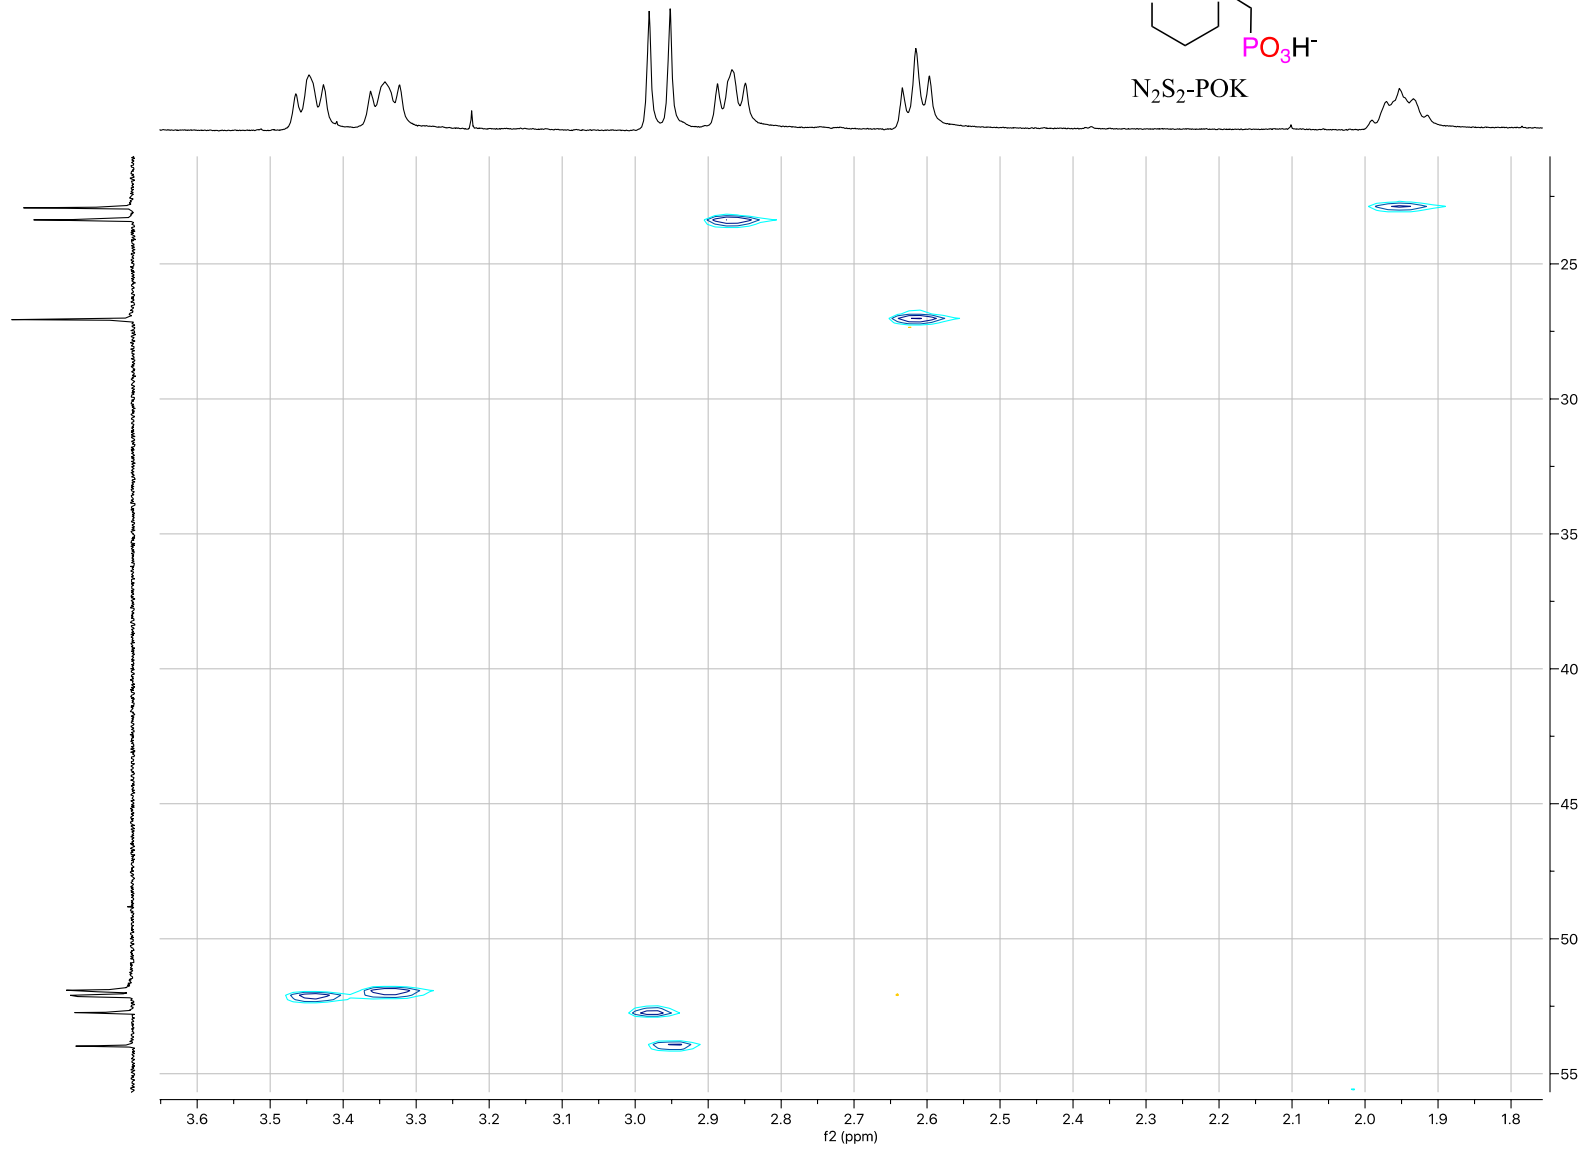

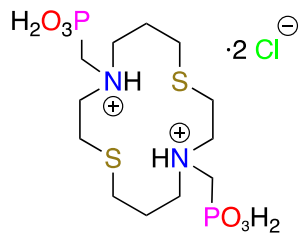

$N_2S_2$ -POH-HCl

C:\Xcalibur\...lit-02-03\_190610110953

6/10/2019 11:09:53 AM

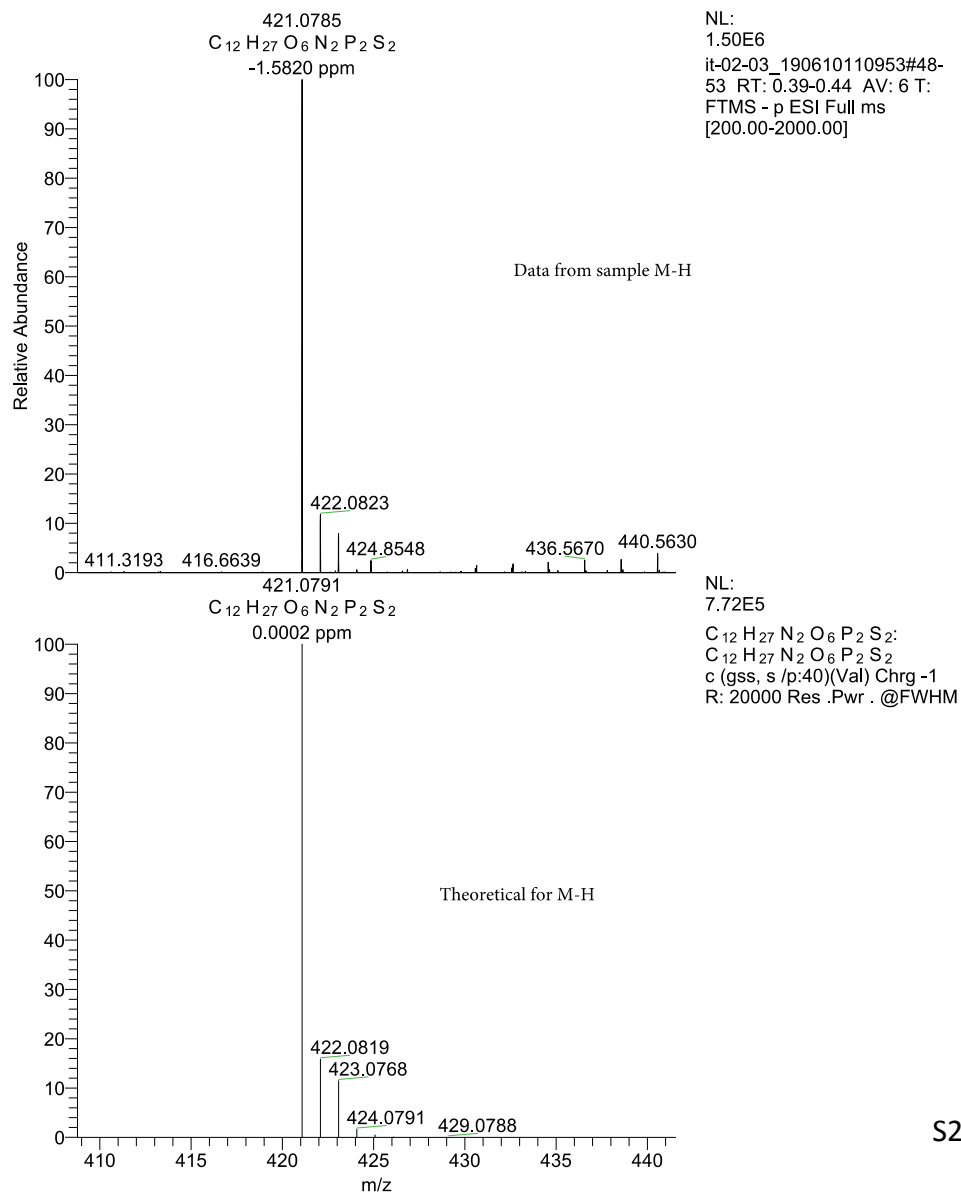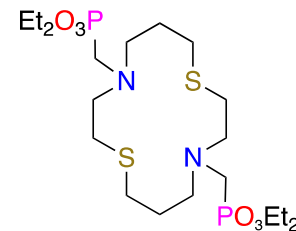

$N_2S_2$ -POEt

C:\Xcalibur\data\2019\June\lit-02-05

6/10/2019 10:26:47 AM

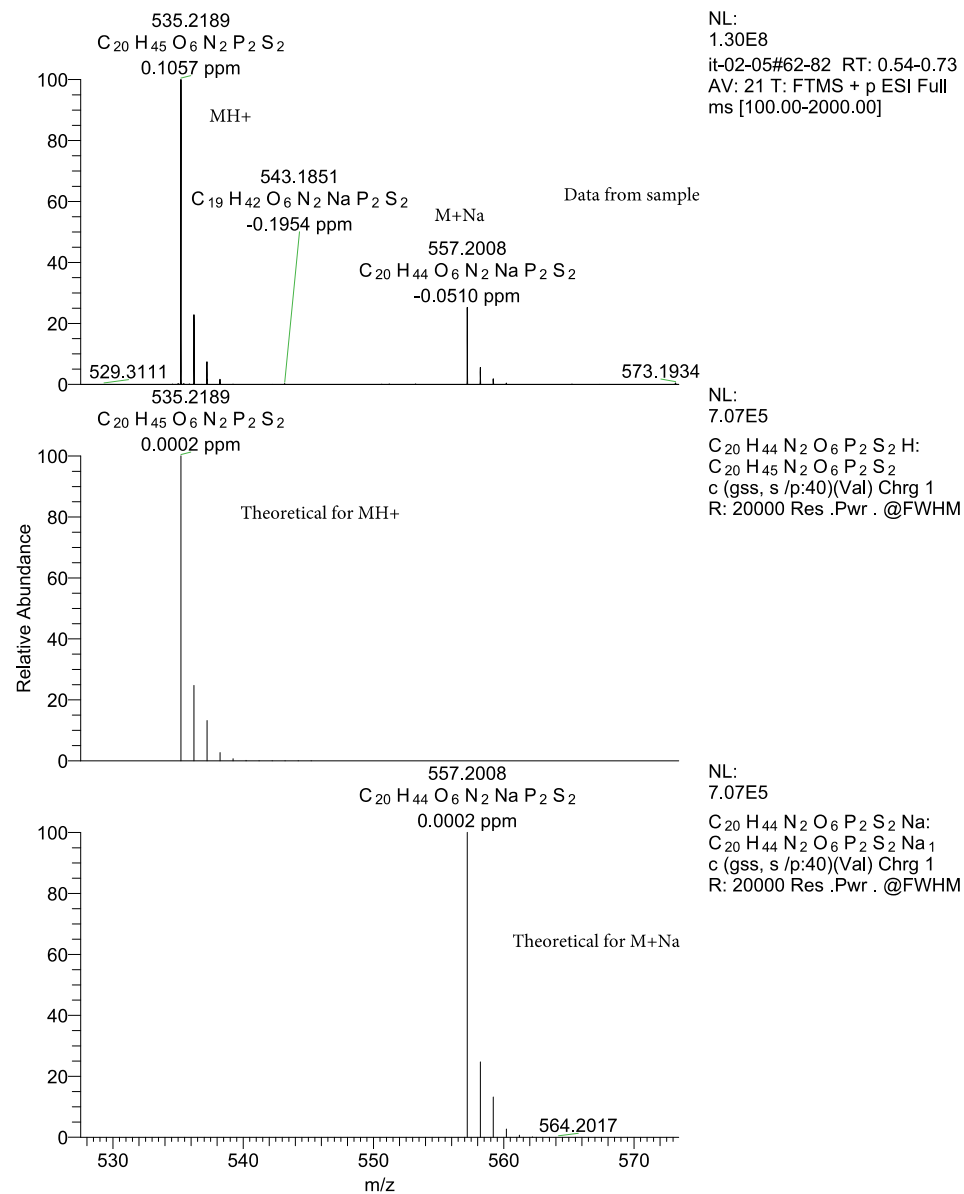

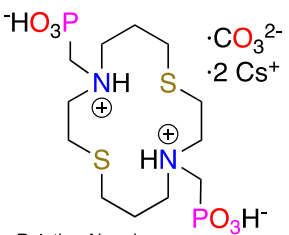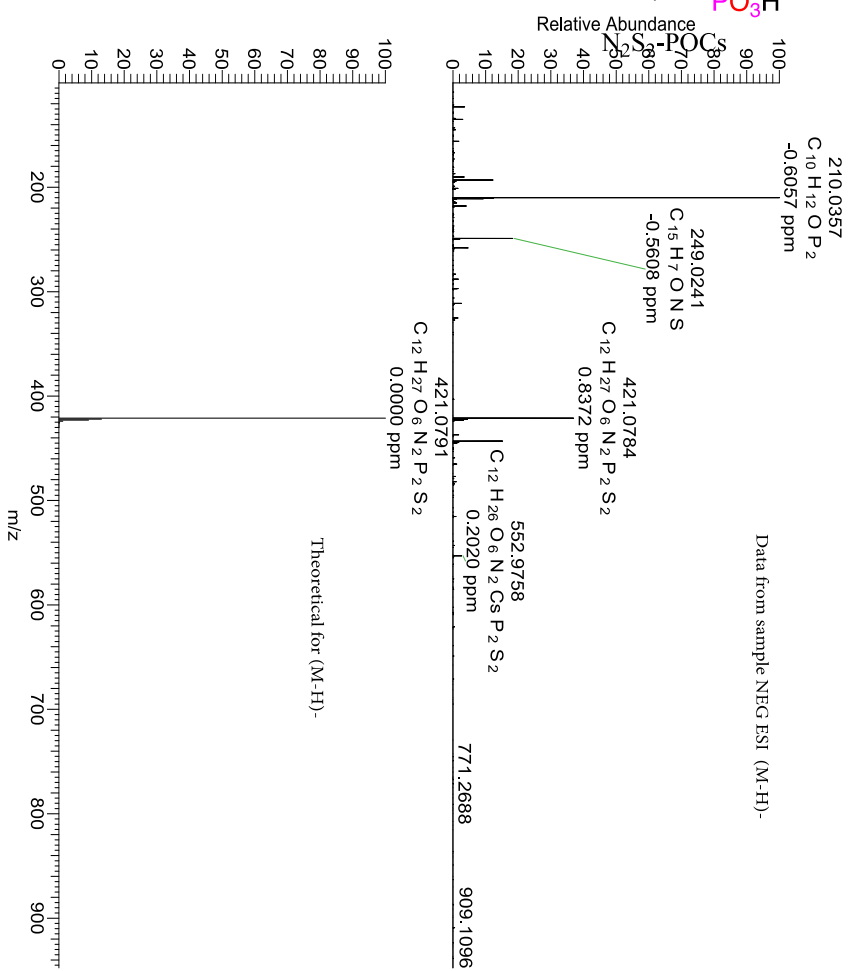

NL:  
1.11E7  
it-02-08-Cs\_190813164323#22-  
41 RT: 0.17-0.32 AV: 20 SB: 39  
0.02-0.07 , 0.71-0.95 T: FTMS -  
p ESI Full ms [100.00-2000.00]

NL:  
7.7ZE5  
C<sub>12</sub>H<sub>27</sub>N<sub>2</sub>O<sub>6</sub>P<sub>2</sub>S<sub>2</sub>:  
C<sub>12</sub>H<sub>27</sub>N<sub>2</sub>O<sub>6</sub>P<sub>2</sub>S<sub>2</sub>:  
pa Chrg -1

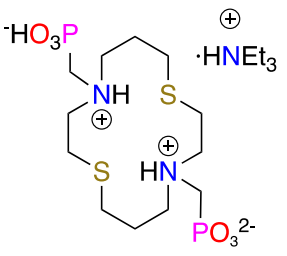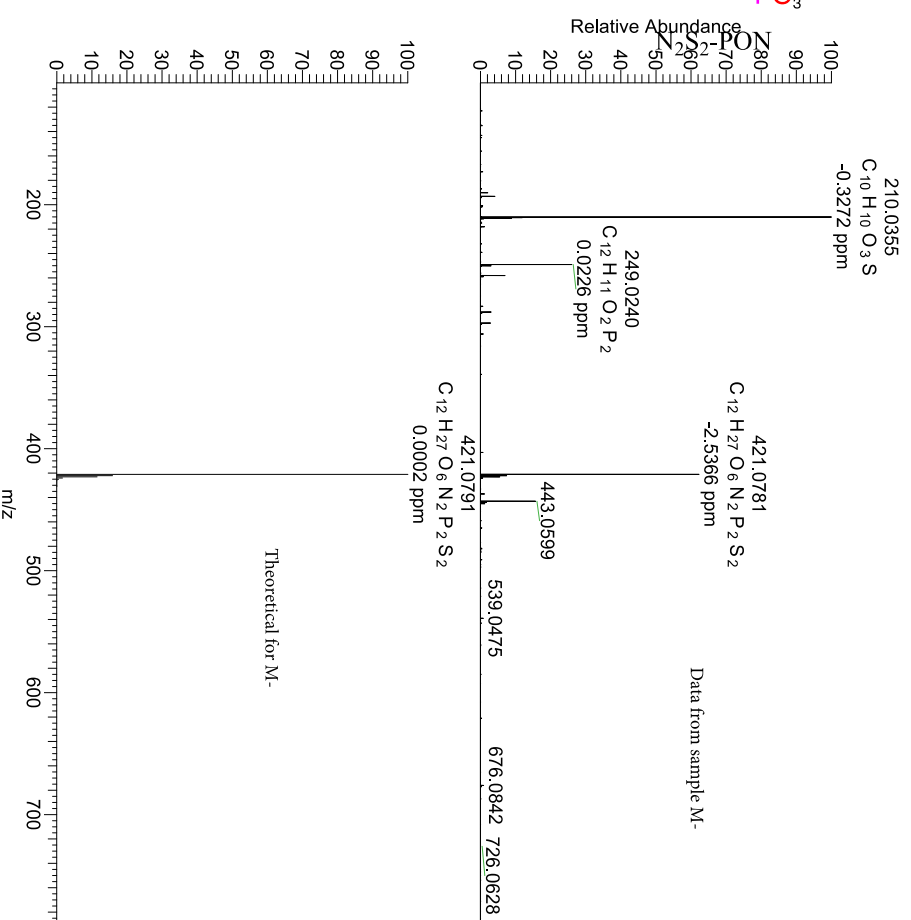

NL:  
3.94E7  
it-02-08-NEI3\_190813164040#31-  
40 RT: 0.24-0.31 AV: 10 SB: 52  
0.02-0.09 , 0.74-1.07 T: FTMS -p  
ESI Full ms [100.00-2000.00]

NL:  
7.7ZE5  
C<sub>12</sub>H<sub>27</sub>N<sub>2</sub>O<sub>6</sub>P<sub>2</sub>S<sub>2</sub>:  
C<sub>12</sub>H<sub>27</sub>N<sub>2</sub>O<sub>6</sub>P<sub>2</sub>S<sub>2</sub>:  
c (gss, s /p:40)(Val) Chrg -1  
R: 20000 Res. Pwr. @FWHM

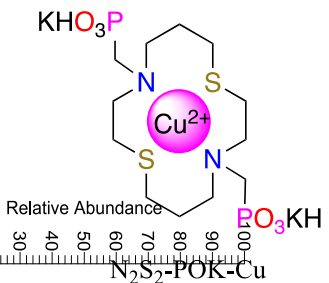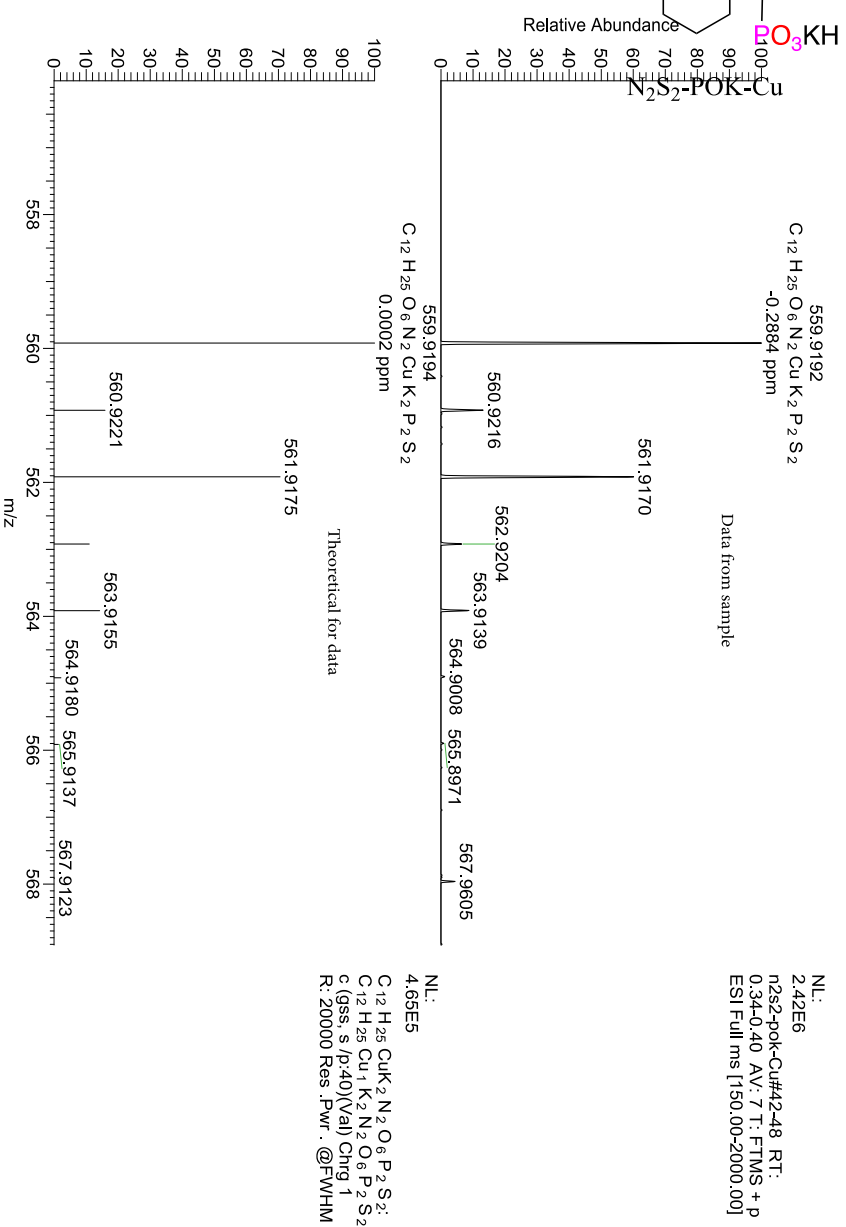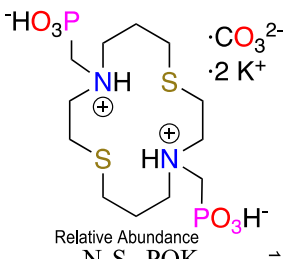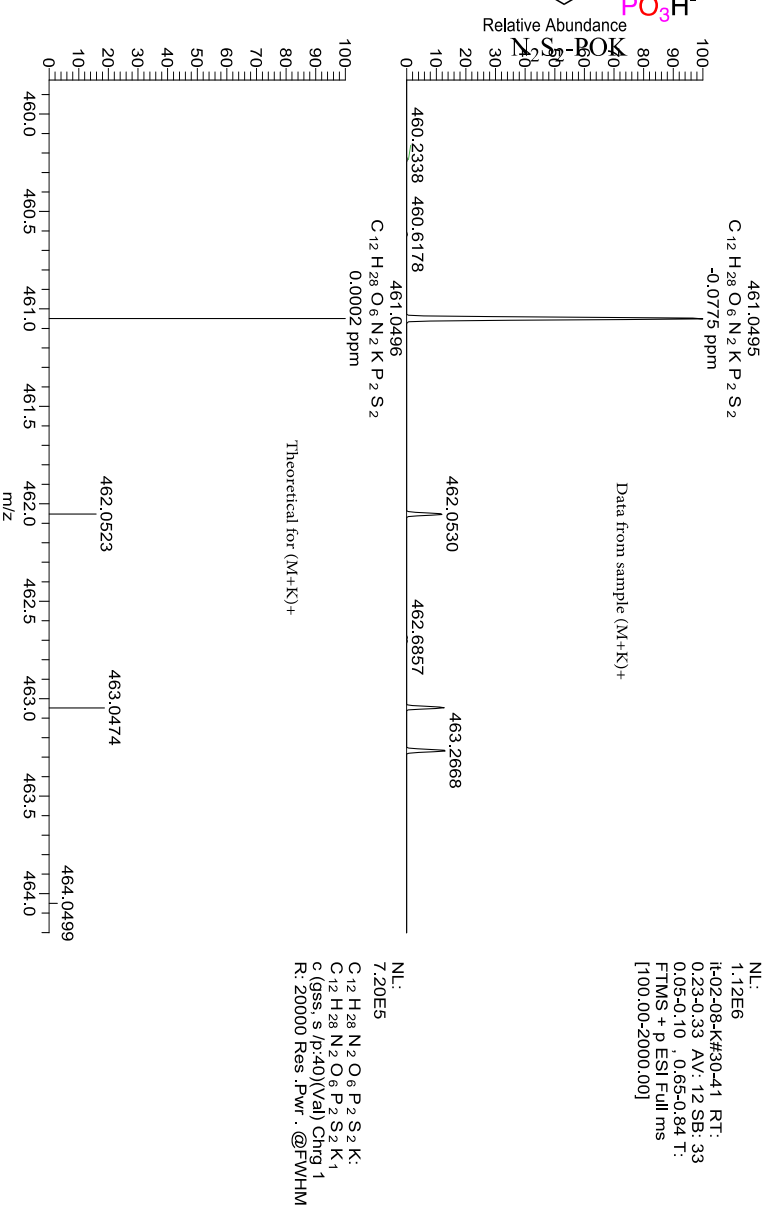

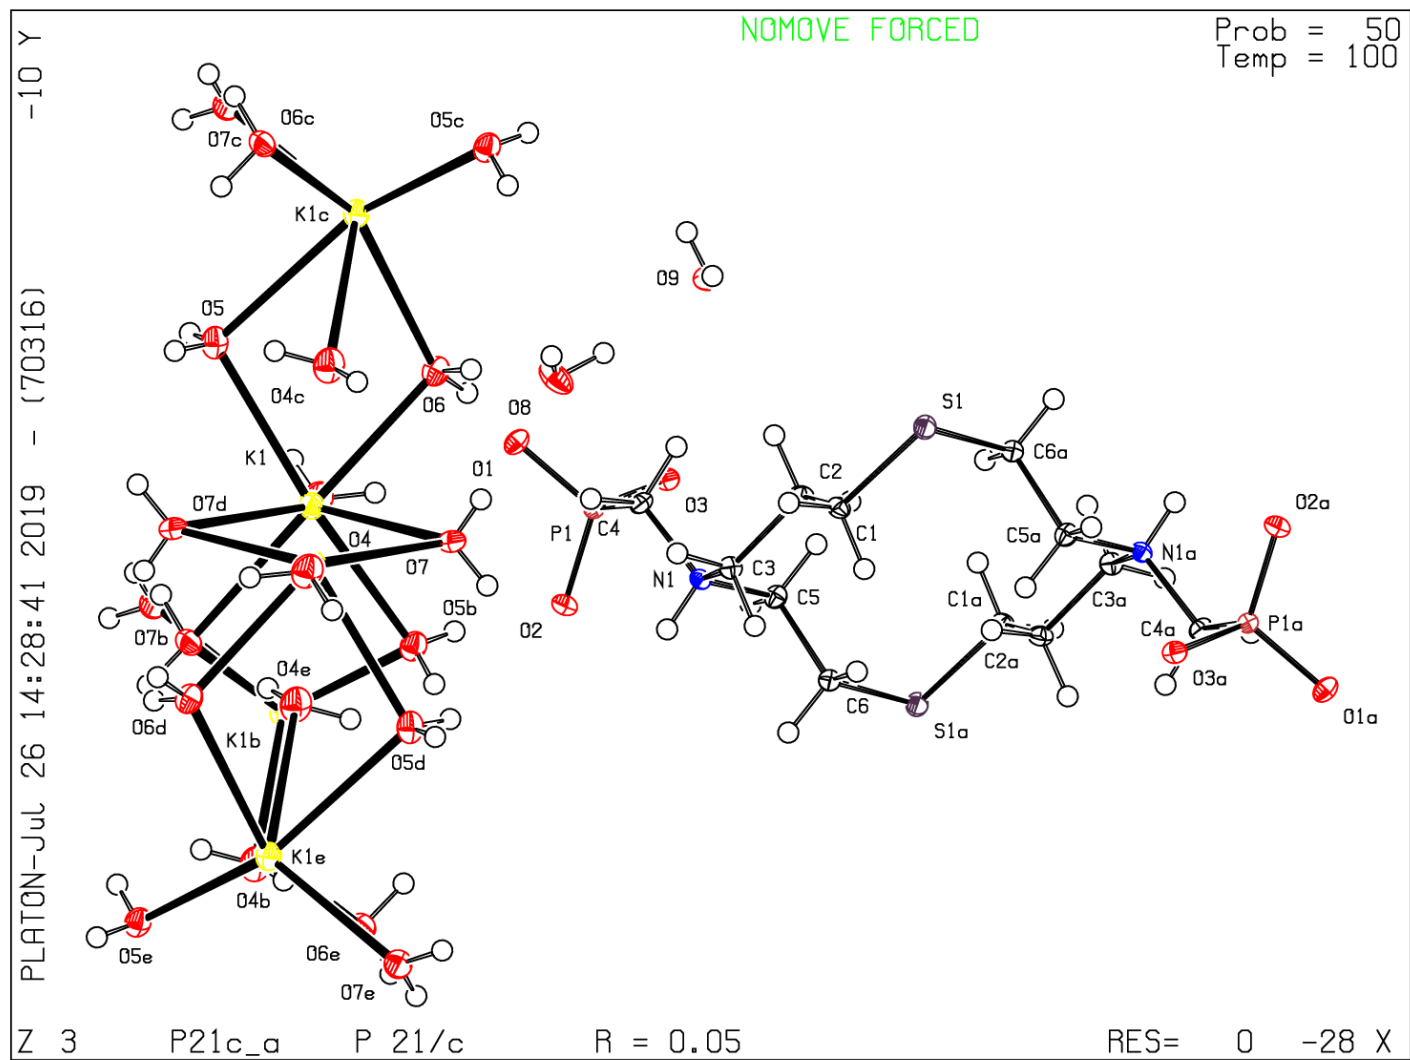

**Figure S1.** Ellipsoid plot for compound L1 with ellipsoid contour at 50% probability

**Table S1.** Crystal data and structure refinement parameters for N<sub>2</sub>S<sub>2</sub>-POK

| <b>Compound</b>                                  | <b>N<sub>2</sub>S<sub>2</sub>-POK</b>              |
|--------------------------------------------------|----------------------------------------------------|
| Empirical formula                                | C <sub>6</sub> H <sub>25</sub> KNO <sub>9</sub> PS |
| Formula weight                                   | 357.40                                             |
| Crystal system                                   | Monoclinic                                         |
| Space group                                      | P2 <sub>1</sub> /c                                 |
| a/ Å                                             | 18.4319(11)                                        |
| b/ Å                                             | 8.4812(5)                                          |
| c/ Å                                             | 10.0288(5)                                         |
| α(°)                                             | 90                                                 |
| β(°)                                             | 100.191(4)                                         |
| γ(°)                                             | 90                                                 |
| Volume (Å <sup>3</sup> )                         | 1543.01(15)                                        |
| Z                                                | 4                                                  |
| D <sub>c</sub> (Mg/m <sup>3</sup> )              | 1.538                                              |
| μ (mm <sup>-1</sup> )                            | 0.619                                              |
| F(000)                                           | 760                                                |
| reflns collected                                 | 14493                                              |
| indep. reflns                                    | 3854                                               |
| GOF on F <sup>2</sup>                            | 1.018                                              |
| R1 (on F <sub>o</sub> <sup>2</sup> , I > 2σ(I))  | 0.0452                                             |
| wR2 (on F <sub>o</sub> <sup>2</sup> , I > 2σ(I)) | 0.0880                                             |
| R1 (all data)                                    | 0.0743                                             |
| wR2 (all data)                                   | 0.1008                                             |

**Table S2.** Selected bond angles and bond lengths for N<sub>2</sub>S<sub>2</sub>-POK and N<sub>2</sub>S<sub>2</sub>-HCl.

| Bond lengths, Å | N <sub>2</sub> S <sub>2</sub> -POK | N <sub>2</sub> S <sub>2</sub> -HCl            |
|-----------------|------------------------------------|-----------------------------------------------|
| S-C             | 1.808(2), 1.811(3)                 | 1.807(2), 1.820(3), 1.807(2),<br>1.817(2)     |
| N-C             | 1.502(3), 1.511 (3), 1.497(3)      | 1.501(3), 1.497(3), 1.491(3),<br>1.501(3)     |
| Bond Angles°    |                                    |                                               |
| C-S-C           | 102.39(12)                         | 102.5(12), 102.1(12)                          |
| C-N-C           | 112.84(18), 110.9(2), 114.00(18)   | 117.2(19), 116.3(19)                          |
| C-C-S           | 112.17(16), 114.16(17)             | 113.3(17), 114.4(17), 112.3(16),<br>114.9(17) |
| C-C-C           | 108.17(19)                         | 110.0(2), 109.4(2)                            |
| N-C-C           | 115.52(19), 112.12(19)             | 111.3(19), 112.8(2), 110.9(19),<br>112.2(19)  |

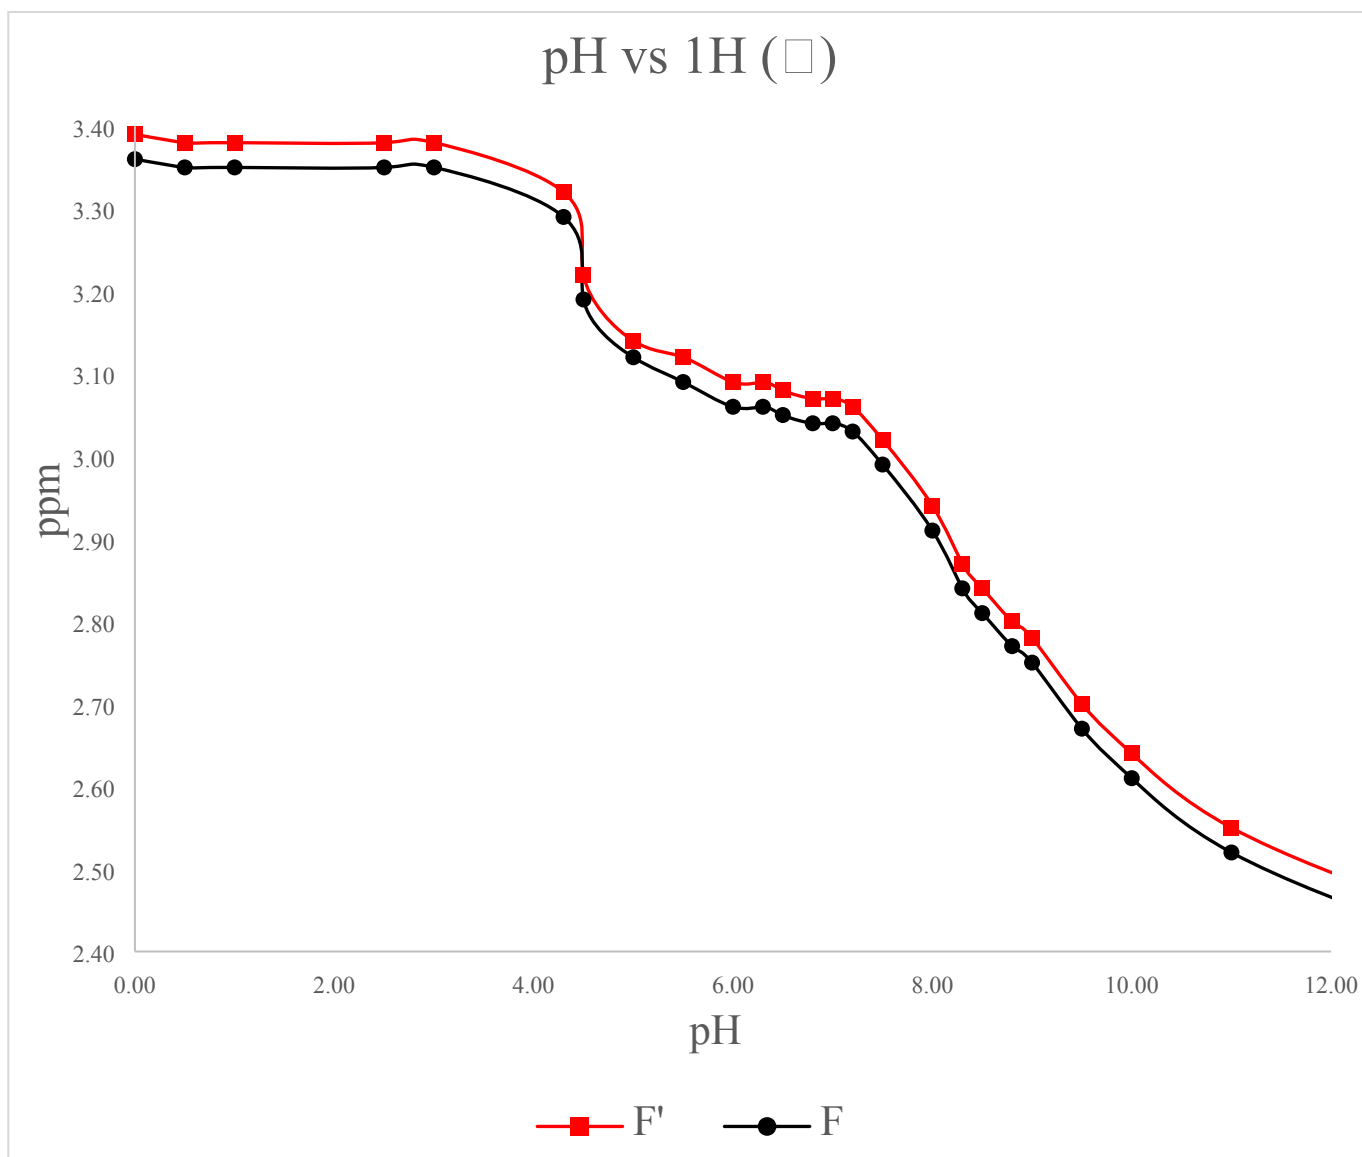

**Figure S2.** pH dependence on chemical shift ( $\nu$ ) of phosphorus nuclei



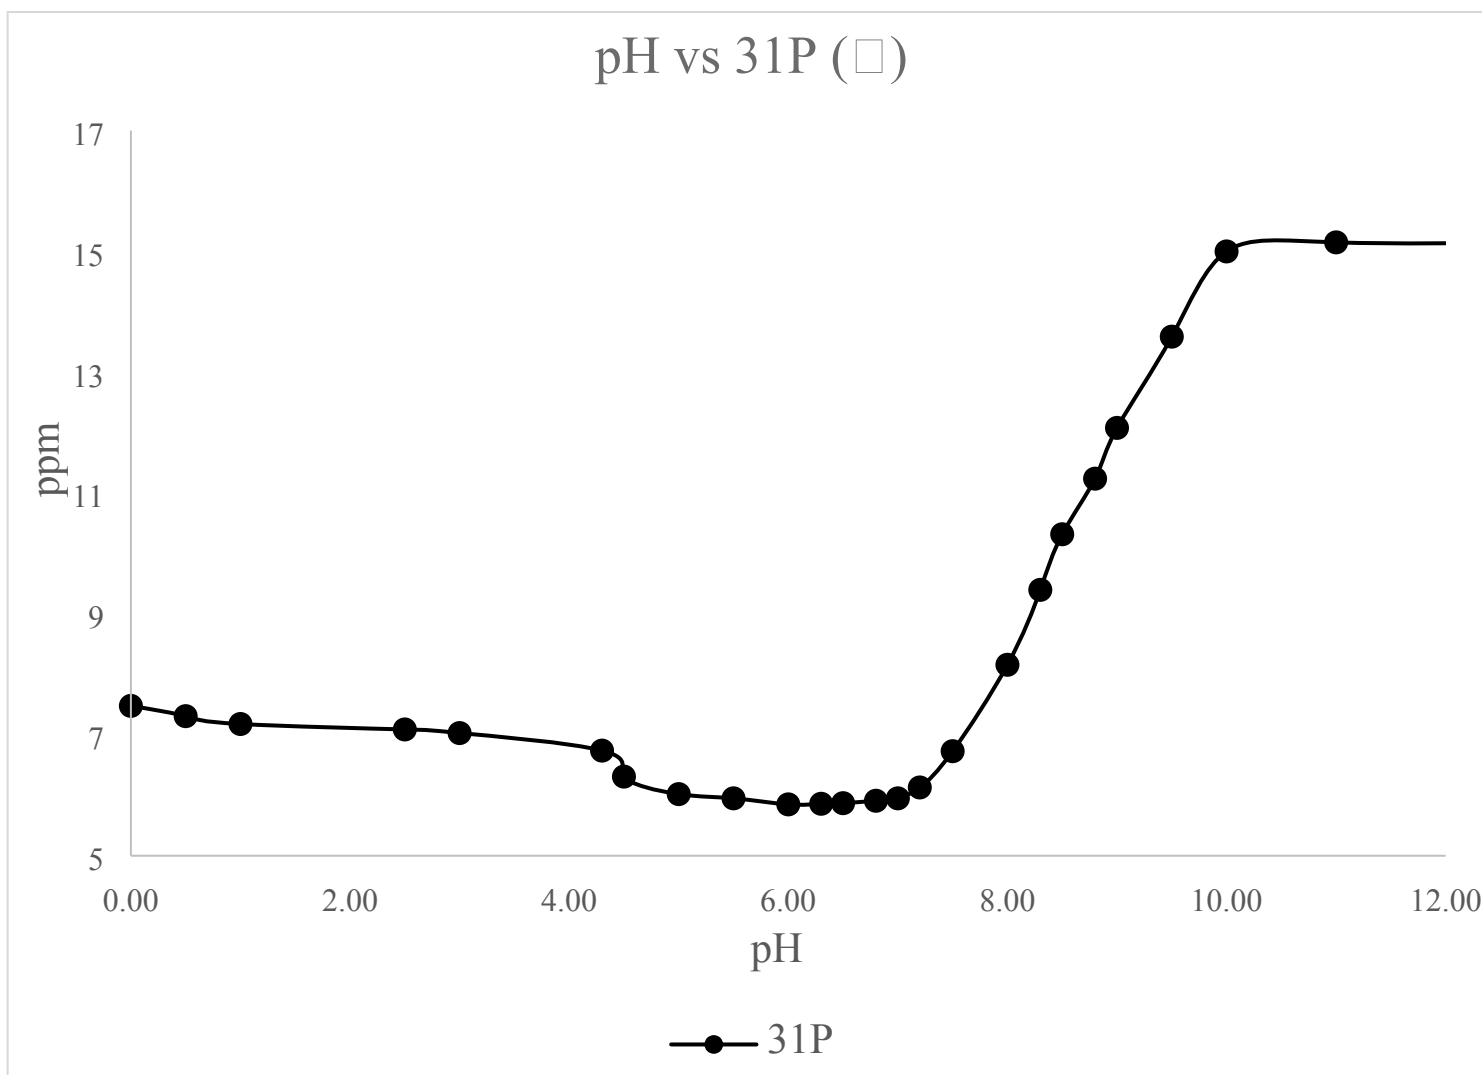

Figure S3. pH dependence on chemical shift ( $\nu$ ) of  $^1\text{H}$ 's f and f'

### Benesi-Hildebrand Procedure:

All thermodynamic studies were performed using UV-Vis spectroscopy from 200-1100 nm at 25 °C in an aqueous buffer (0.1 M KCl, pH = 5). All solutions were made in 5 mL volumetric flasks maintaining a constant copper perchlorate concentration ( $c_{Cu} = 3 \times 10^{-3}$  M). **N<sub>2</sub>S<sub>2</sub>-POK** stock solution ( $c_{N_2S_2POK} = 3 \times 10^{-2}$  M) was made with copper perchlorate solution made above. Concentration ranges for **N<sub>2</sub>S<sub>2</sub>-POK** ranged from 0 –  $9.9 \times 10^{-3}$  and the absorption band utilized for determination of the conditional stability constant was  $\lambda_{max} = 635$  nm. Derivations for final fitting of data are provided below:

• Derivation and to afford  $K_{therm}$ :

$$K_{therm}^{HG} = K_{cond}^{HG} \alpha_H$$

$$\alpha_H = \frac{K_1 K_2 [H_3O^+]^2}{1 + K_1 [H_3O^+] + K_1 K_2 [H_3O^+]^2 + K_1 K_2 K_3 [H_3O^+]^3 + K_1 K_2 K_3 [H_3O^+]^3 + K_1 K_2 K_3 K_4 [H_3O^+]^4 + K_1 K_2 K_3 K_4 K_5 [H_3O^+]^5 + K_1 K_2 K_3 K_4 K_5 K_6 [H_3O^+]^6}$$

Where:  $K_{therm}^{HG}$ : Thermodynamic stability Constant

$K_{cond}^{HG}$ : Conditional Stability Constant

• Derivation to fit  $K_{cond}^{HG}$  to the UV-Vis data:

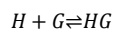

$$K = \frac{[HG]}{[H][G]}$$

$$[H] = [H]_o - [HG]$$

$$[G] = [G]_o - [HG]$$

$$K = \frac{[HG]}{([H]_o - [HG])([G]_o - [HG])}$$

$$[HG]^2 - ([H]_o + [G]_o)[HG] + [H]_o[G]_o = \frac{[HG]}{K}$$

$$[HG]^2 - \left([H]_o + [G]_o + \frac{1}{K}\right)[HG] + [H]_o[G]_o = 0$$

Quadratic Equation Solving for [HG]:

$$[HG] = \frac{1}{2} \left[ \left( [H]_o + [G]_o + \frac{1}{K} \right) \pm \sqrt{\left( [H]_o + [G]_o + \frac{1}{K} \right)^2 - 4[H]_o[G]_o} \right]$$

$$\Delta A = \epsilon_{HG}[HG] - \epsilon_G \Delta[G] - \epsilon_H \Delta[H] = \epsilon_{HG}[HG] - \epsilon_G [HG] - \epsilon_H [HG]$$

$$\Delta A = (\epsilon_{HG} - \epsilon_G - \epsilon_H)[HG] = \Delta \epsilon [HG]$$

$$\Delta A = \frac{\Delta \epsilon}{2} \left[ \left( [H]_o + [G]_o + \frac{1}{K} \right) \pm \sqrt{\left( [H]_o + [G]_o + \frac{1}{K} \right)^2 - 4[H]_o[G]_o} \right]$$

UV-Vis

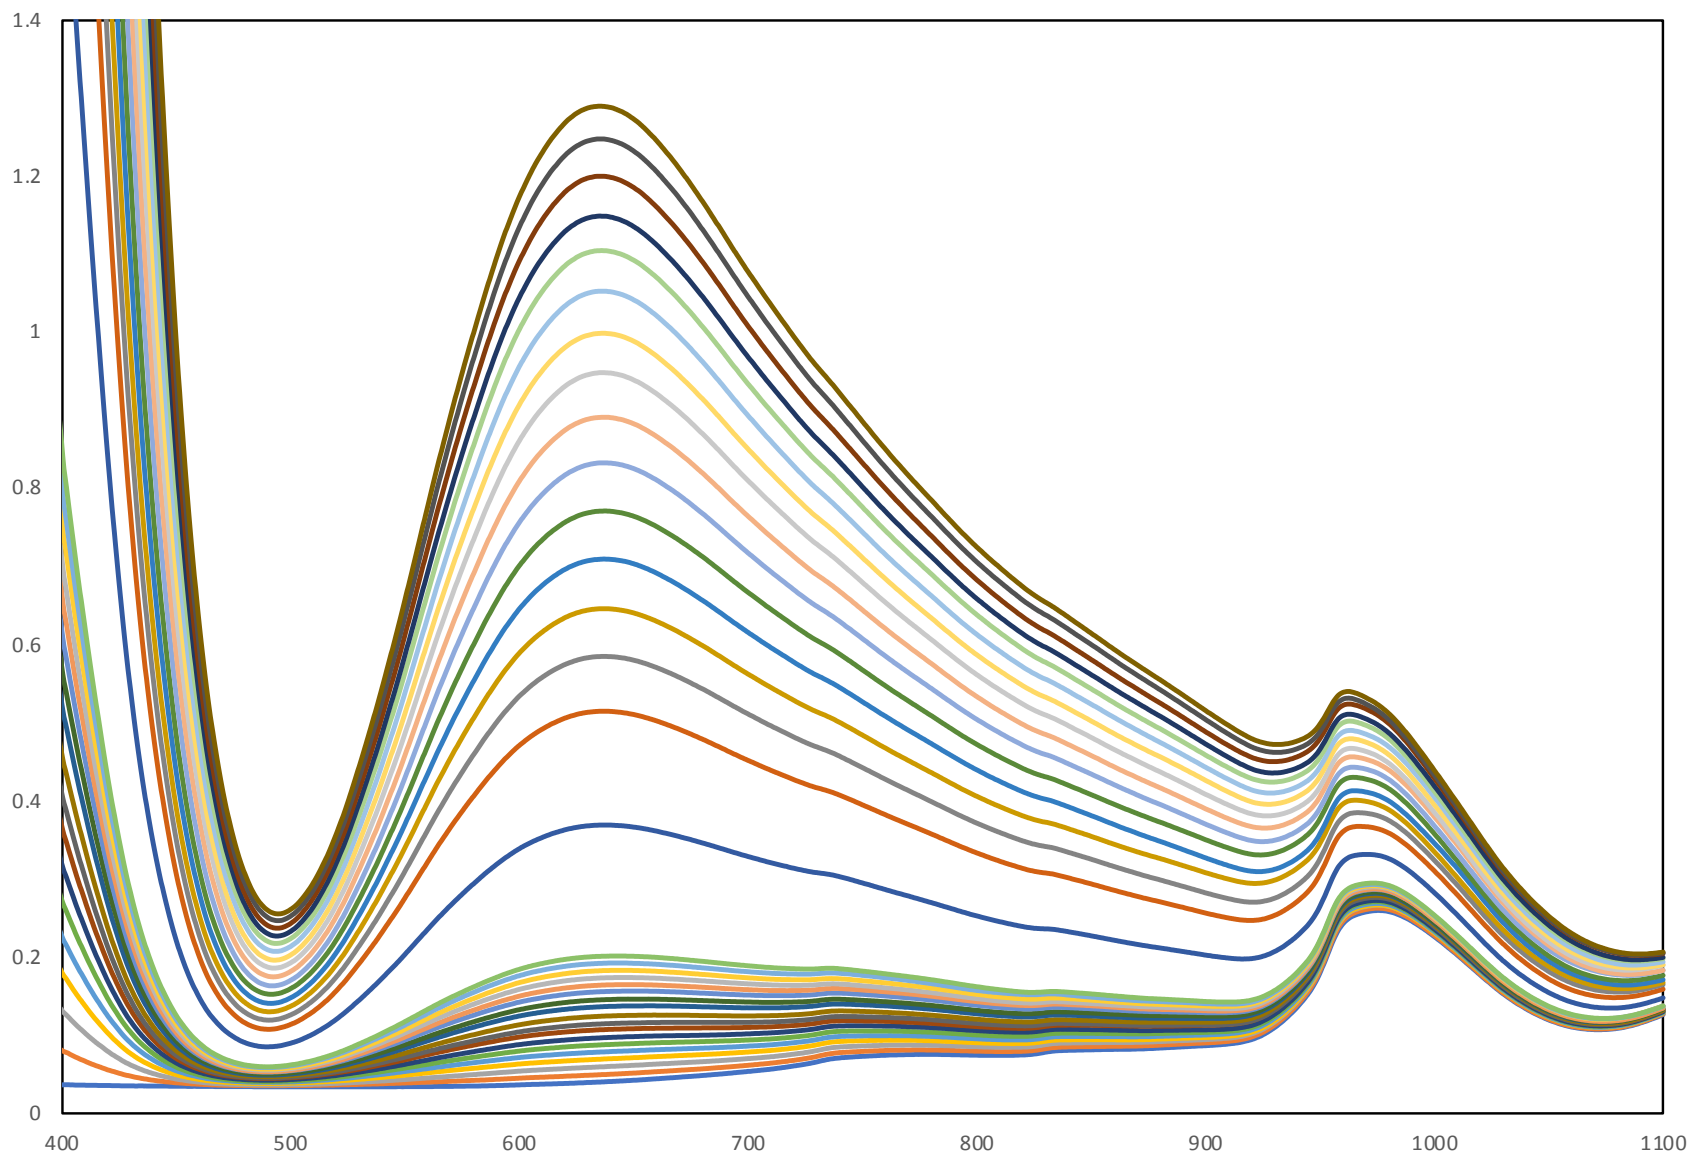

S35
